# Supplementary material for: Characteristics of the main primary source profiles of particulate matter across China from 1987 to 2017
Source: Copernicus journal article supplement (doi:10.5194/acp-19-3223-2019), 2019-03-12
Supplement: Supplementary file 1 [file Database_source profiles in China.xlsx]

## Sheet: CC
Source	Sub-type	City	Year	Size	Fuel type	Sampling method	Na	Mg	Al	S	Si	K	Ca	Ti	V	Cr	Mn	Fe	Ni	Cu	Pb	Zn	As	Cd	OC	EC	TC	Ca2+	K+	Mg2+	F-	Cl-	NH4+	NO3-	SO42-	Elemental analysis	Ion analysis	OC/EC analysis	Reference	Note
CC	residential coal combustion	Xi'an	2015	PM10	briquettes	dilution tunnel sampling	0.00339	0.00091	0.00107	-	0.000706	0.006625	0.000325	1.5e-05	5e-06	1.6e-05	1.6e-05	0.000502	6e-06	9.4e-05	0.011479	0.013245	0.000723	9e-05	0.420809	0.003125		0.000873	0.007853	3.9e-05	0.000291	0.030716	0.03076	0.005966	0.102424	ICP-AES	Ion chromatography	thermal Optical Analyzer (NOISH 5040 protocol)	Dai et al., 2019	Dai, Q. L., Bi, X. H., Song, W. B, Li, T. K., Liu, B. S., Ding, J., Xu, J., Song, C. B., Yang, N. W., Schulze, B. C., Zhang, Y. F., Feng, Y. C., Hopke, P.K.: Residential coal combustion as a source of primary sulfate in Xi'an, China, Atmos. Environ.,196, 66-76, 2019.
CC	residential coal combustion	Xi'an	2015	PM10	chunk coal	dilution tunnel sampling	0.018353	0.000821	0.000643	-	0.00067	0.000391	0.000545	1.8e-05	2e-06	5e-06	2.5e-05	0.000181	6e-06	4.1e-05	0.001907	0.000792	0.000804	1e-05	0.358858	0.039528		0.004292	0.000463	0.000348	NA	0.0012	0.037142	0.012329	0.122459	ICP-AES	Ion chromatography	thermal Optical Analyzer (NOISH 5040 protocol)	Dai et al., 2019	Dai, Q. L., Bi, X. H., Song, W. B, Li, T. K., Liu, B. S., Ding, J., Xu, J., Song, C. B., Yang, N. W., Schulze, B. C., Zhang, Y. F., Feng, Y. C., Hopke, P.K.: Residential coal combustion as a source of primary sulfate in Xi'an, China, Atmos. Environ.,196, 66-76, 2019.
CC	residential coal combustion	Tianjin	2003	PM10	coal cake	dilution tunnel sampling	0.0024	0.00148	0.00157	0.126	0.00394	0.00541	0.00148	-	-	0.000365	1.9e-05	0.00184	0.000659	7.9e-05	0.0255	0.0309	0.00205	0.000302	-	-		-	-	-	0.00394	0.0492	-	-	-	X-ray fluorescence			Ge et al., 2004	Ge, S., Xu, X., and Chow, J, C.: Emissions of Air Pollutants from Household Stoves: Honeycomb Coal versus Coal Cake, Environ. Sci. Technol., 38, 4612-4618, 2004.
CC	residential coal combustion	Tianjin	2003	PM10	honeycomb coal briquettes	dilution tunnel sampling	0.15	-	0.000332	0.128	0.000947	0.13	0.000472	-	-	0.000434	5e-06	0.000782	0.000466	0.000255	0.0059	0.00745	0.00059	0.000142	-	-		-	-	-	0.00258	0.126	-	-	-	X-ray fluorescence			Ge et al., 2004	Ge, S., Xu, X., and Chow, J, C.: Emissions of Air Pollutants from Household Stoves: Honeycomb Coal versus Coal Cake, Environ. Sci. Technol., 38, 4612-4618, 2004.
CC	residential coal combustion	Tianjin	1985	PM12	honeycomb briquette/coal cake	bacho sampling (coal ash)	0.0079	0.0089	0.0738	-	0.104	0.00112	0.0581	0.0048	0.00013	5.7e-05	0.000414	0.0227	4.1e-05	0.000133	0.00288	0.00326	0.000134	-	-	-		-	-	-	-	-	-	-	-	ICP-AES			Dai et al., 1987	Dai, S. G., Zhu, T., Zeng, Y. S., Fu, X. Q., Liao, Y. M.: Composition characteristics of industrial and residential coal smoke in Tianjin, Environmental Science, 8, 18-23, 1987.
CC	residential coal combustion	Guiyang	2014	PM2.5		resuspended sampling(coal ash)	0.008417	0.010617	0.1128	-	0.254136	0.014883	0.01028	0.0215	0.000356	0.00015	0.00045	0.077867	7.1e-05	0.000243	0.000944	0.00046	0.000561	1.6e-05	0.07648	0.1801		0.010283	-	-	-	0	-	0	0.0041	ICP-MS	Ion chromatography	thermal Optical Analyzer (IMPROVE A)	Wang et al., 2016	Wang, Z., Guo, J, and Chen, Z.: Analysis of the source componential spectrum of PM2.5 emission in Guiyang, Journal of Safety and Environment, 16, 346-351, 2016.
CC	residential coal combustion	Xi'an	2015	PM2.5	briquettes	dilution tunnel sampling	0.007525	0.000187	0.00042	-	0.000442	0.003812	0.000112	6e-06	6e-06	2.4e-05	5e-06	0.000228	3e-06	4.4e-05	0.008379	0.009252	0.000425	1e-06	0.493172	0.002576		0.000708	0.005204	6.9e-05	0.000983	0.019412	0.021326	0.003875	0.165802	ICP-AES	Ion chromatography	thermal Optical Analyzer (NOISH 5040 protocol)	Dai et al., 2019	Dai, Q. L., Bi, X. H., Song, W. B, Li, T. K., Liu, B. S., Ding, J., Xu, J., Song, C. B., Yang, N. W., Schulze, B. C., Zhang, Y. F., Feng, Y. C., Hopke, P.K.: Residential coal combustion as a source of primary sulfate in Xi'an, China, Atmos. Environ.,196, 66-76, 2019.
CC	residential coal combustion	Xi'an	2015	PM2.5	chunk coal	dilution tunnel sampling	0.018224	0.001504	0.000298	-	0.000551	0.000809	0.000286	1.9e-05	2e-06	1.4e-05	2.1e-05	0.000163	1.9e-05	5.6e-05	0.001097	0.000792	0.000719	1e-06	0.320003	0.052264		0.004525	0.000262	0.000345	NA	0.010521	0.099218	0.011157	0.292227	ICP-AES	Ion chromatography	thermal Optical Analyzer (NOISH 5040 protocol)	Dai et al., 2019	Dai, Q. L., Bi, X. H., Song, W. B, Li, T. K., Liu, B. S., Ding, J., Xu, J., Song, C. B., Yang, N. W., Schulze, B. C., Zhang, Y. F., Feng, Y. C., Hopke, P.K.: Residential coal combustion as a source of primary sulfate in Xi'an, China, Atmos. Environ.,196, 66-76, 2019.
CC	residential coal combustion	Tianjin	2012	PM2.5	chunk coal	dilution tunnel sampling	-	-	-	-	-	-	-	-	9e-06	0.000246	0.000291	0	0.000184	0.000308	0.000373	0.002103	7.7e-05	2e-06	0.54	0.0931		0.007303	0.005982	0.002074	0	0.0101	0.001786	0.006448	0.081578	ICP-MS	Ion chromatography	thermal Optical Analyzer (IMPROVE A)	Liu et al., 2016	Liu, H. B., Kong, S. F., Wang, W., Yan, Q.: Emission Inventory of Heavy Metals in Fine Particles Emitted from Residential Coal Burning in China, Environmental Science, 37, 2823-2835, 2016.	Yan,Q.,Kong,S.F.,Liu,H.B.,Wang,W.,Wu,J.,Zheng,M.M.,Zheng,S.R.,Yang,G.W.,Wu,F.Q.:Emission inventory of water soluble ions in fine particles from residential coal burning in China and implication for emission reduction,China Environmental Science,37,3708-3721,2017.	Kong,S.F.,Bai,Z.P.,Lu,B.:Comparative analysis on emission factors of carbonaceous components in PM2.5 and PM10 from domestic fuels combustion,China Environmental Science ,34,2749-2756,2014.
CC	residential coal combustion	Tianjin	2003	PM2.5	coal cake	dilution tunnel sampling	-	0.00296	0.0147	0.367	0.0339	0.0119	0.00576	0.000628	-	0.00121	2.9e-05	0.00777	0.00073	7.9e-05	0.0299	0.0462	0.00237	0.000313	-	-		-	-	-	0.00442	-	-	-	-	X-ray fluorescence			Ge et al., 2004	Ge, S., Xu, X., and Chow, J, C.: Emissions of Air Pollutants from Household Stoves: Honeycomb Coal versus Coal Cake, Environ. Sci. Technol., 38, 4612-4618, 2004
CC	residential coal combustion	Tianjin	2012	PM2.5	honeycomb briquette	dilution tunnel sampling	-	-	-	-	-	-	-	-	2e-06	8.9e-05	6.4e-05	0	4e-05	0.000291	0.008159	0.005041	0.000297	3.3e-05	0.175	0.0003		0.0028283	0.041793	0.000258	0.002052	0.028463	0.002677	0.003279	0.148638	ICP-MS	Ion chromatography	thermal Optical Analyzer (IMPROVE A)	Liu et al., 2016	Liu, H. B., Kong, S. F., Wang, W., Yan, Q.: Emission Inventory of Heavy Metals in Fine Particles Emitted from Residential Coal Burning in China, Environmental Science, 37, 2823-2835, 2016.	Yan,Q.,Kong,S.F.,Liu,H.B.,Wang,W.,Wu,J.,Zheng,M.M.,Zheng,S.R.,Yang,G.W.,Wu,F.Q.:Emission inventory of water soluble ions in fine particles from residential coal burning in China and implication for emission reduction,China Environmental Science,37,3708-3721,2017.	Kong,S.F.,Bai,Z.P.,Lu,B.:Comparative analysis on emission factors of carbonaceous components in PM2.5 and PM10 from domestic fuels combustion,China Environmental Science ,34,2749-2756,2014.
CC	residential coal combustion	Tianjin	2003	PM2.5	honeycomb coal briquettes	dilution tunnel sampling	0.127	-	0.00132	0.302	0.00349	0.174	0.000562	-	1e-06	0.000253	3.1e-05	0.000781	0.000283	0.000279	0.00512	0.0027	0.000224	0.000174	-	-		-	-	-	0.00299	0.105	-	-	-	X-ray fluorescence			Ge et al., 2004	Ge, S., Xu, X., and Chow, J, C.: Emissions of Air Pollutants from Household Stoves: Honeycomb Coal versus Coal Cake, Environ. Sci. Technol., 38, 4612-4618, 2004
CC	coal-fired industrial boilers		2014-2015	PM2.5		dilution tunnel sampling	0. 0060	0.0083	0.0532		0.0502	0.0043	0.0199	0. 0017	0.0001	0. 0004	0. 0005	0.0365	0.0002	0.0002	0.0003	0.0008	0.0004		0.0644	0.0166		0.0121					0.0136	0.0004	0.1266	ICP-MS	Ion chromatography	thermal/optical carbon analyzer (DRI Model 2001A)	Liu et al., 2017	Liu, Y. Y., Zhang, W. J., Bai, Z. P., et al.: Characteristics of PM2. 5chemical source profiles of coal combustion and industrial process in China, Research of Environmental Sciences, 30, 1859-1868, 2017．
CC	coal-fired industrial boilers		2014-2015	PM2.5		dilution tunnel sampling	0. 0013	0.0169	0.0824		0.0547	0.0013	0.0368	0. 0019	0	0. 0002	0. 0001	0.0598	0.0002	0	0.0001	0.0005	0		0.094	0.0474		0.021					0.0359	0. 0011	0.10.33	ICP-MS	Ion chromatography	thermal/optical carbon analyzer (DRI Model 2002A)	Liu et al., 2017	Liu, Y. Y., Zhang, W. J., Bai, Z. P., et al.: Characteristics of PM2. 5chemical source profiles of coal combustion and industrial process in China, Research of Environmental Sciences, 30, 1859-1868, 2017．
CC	coal-fired industrial boilers		2014-2015	PM2.5		dilution tunnel sampling	0. 0044	0.0071	0.0451		0.0436	0.004	0.0463	0. 0028	0.0001	0. 0006	0. 0003	0.0274	0.0004	0.0004	0	0.0003	0. 0001		0.0167	0.0261		0.0206					0.048	0.0094	0.2117	ICP-MS	Ion chromatography	thermal/optical carbon analyzer (DRI Model 2003A)	Liu et al., 2017	Liu, Y. Y., Zhang, W. J., Bai, Z. P., et al.: Characteristics of PM2. 5chemical source profiles of coal combustion and industrial process in China, Research of Environmental Sciences, 30, 1859-1868, 2017．
CC	coal-fired industrial boilers		2014-2015	PM2.5		dilution tunnel sampling	0. 0027	0.0093	0.051		0.0352	0.0047	0.0582	0. 0038	0.0001	0. 0003	0. 0002	0.0357	0.0001	0.0006	0.0001	0.0007	0.0001		0.1089	0.0237		0.0211					0.0228	0.0346	0.1346	ICP-MS	Ion chromatography	thermal/optical carbon analyzer (DRI Model 2004A)	Liu et al., 2017	Liu, Y. Y., Zhang, W. J., Bai, Z. P., et al.: Characteristics of PM2. 5chemical source profiles of coal combustion and industrial process in China, Research of Environmental Sciences, 30, 1859-1868, 2017．
CC	coal-fired industrial boilers	Xi'an	2014	PM2.5		dilution tunnel sampling		0.00118	0.00651				0.04159					0.04692							0.06994	0.01046						0.07882	0.07882	0.07882	0.07882	ICP-MS	Ion chromatography	thermal/optical carbon analyzer (DRI Model 2004A)	Xia et al., 2017	Xia, Y. J., Huang, X. M., Song, W. B.,Yang, N. W., Yang, Y. L.: Components of PM2.5 and PM10 incoal fired boiler particulate matter of Xi'an an city, Huanjingwuranyufangzhi, 39, 207-211, 2017.
CC	coal-fired industrial boilers	Xi'an	2014	PM2.5		dilution tunnel sampling		0.00087	0.0043				0.00345					0.04979							0.01372	0.03228						0.025	0.01652		0.3573	ICP-MS	Ion chromatography	thermal/optical carbon analyzer (DRI Model 2004A)	Xia et al., 2018	Xia, Y. J., Huang, X. M., Song, W. B.,Yang, N. W., Yang, Y. L.: Components of PM2.5 and PM10 incoal fired boiler particulate matter of Xi'an an city, Huanjingwuranyufangzhi, 39, 207-211, 2017.
CC	coal-fired industrial boilers	Xi'an	2014	PM2.5		dilution tunnel sampling		0.00419	0.00392				0.00573					0.02651							0.01583	0.00568						0.322	0.01126		0.27689	ICP-MS	Ion chromatography	thermal/optical carbon analyzer (DRI Model 2004A)	Xia et al., 2019	Xia, Y. J., Huang, X. M., Song, W. B.,Yang, N. W., Yang, Y. L.: Components of PM2.5 and PM10 incoal fired boiler particulate matter of Xi'an an city, Huanjingwuranyufangzhi, 39, 207-211, 2017.
CC	coal-fired industrial boilers	Xi'an	2014	PM10		dilution tunnel sampling	0.03121	0.00061	0.00243		0.00232	0.00112	0.01877	0.00029				0.01114							0.02113		0.05063								0.27378	ICP-MS	Ion chromatography	thermal/optical carbon analyzer (DRI Model 2004A)	Xia et al., 2020	Xia, Y. J., Huang, X. M., Song, W. B.,Yang, N. W., Yang, Y. L.: Components of PM2.5 and PM10 incoal fired boiler particulate matter of Xi'an an city, Huanjingwuranyufangzhi, 39, 207-211, 2017.
CC	coal-fired industrial boilers	Xi'an	2014	PM10		dilution tunnel sampling	0.04846	0.00139	0.01608		0.2333	0.01311	0.01028	0.00425				0.03516							0.01605		0.0505								0.3156	ICP-MS	Ion chromatography	thermal/optical carbon analyzer (DRI Model 2004A)	Xia et al., 2021	Xia, Y. J., Huang, X. M., Song, W. B.,Yang, N. W., Yang, Y. L.: Components of PM2.5 and PM10 incoal fired boiler particulate matter of Xi'an an city, Huanjingwuranyufangzhi, 39, 207-211, 2017.
CC	coal-fired industrial boilers	Xi'an	2014	PM10		dilution tunnel sampling	0.0278	0.00494	0.01288		0.173	0.01818	0.01156	0.00257				0.0262							0.01174		0.0485								0.2782	ICP-MS	Ion chromatography	thermal/optical carbon analyzer (DRI Model 2004A)	Xia et al., 2022	Xia, Y. J., Huang, X. M., Song, W. B.,Yang, N. W., Yang, Y. L.: Components of PM2.5 and PM10 incoal fired boiler particulate matter of Xi'an an city, Huanjingwuranyufangzhi, 39, 207-211, 2017.
CC	coal-fired industrial boilers	Nanchang	2005	PM10		unknow		0.002433	0.117324				0.024024	0.002692			0.000703	0.049283			0.003416		0.000136													ICP-AES			Peng et al., 2008	Peng, X. L., He, Z. J.: Source apportionment of particulate matter PM10 in Luojia industrial Area of Nanchang City, Jiangxikexue, 26, 808-811, 2008.
CC	coal-fired power plants	Nanjing	2011-2012	PM2.5		resuspended sampling	0.037113	0.026632	0.110132			0.00825	0.077028	0.006292	5e-06	0.004274	0.000943	0.057613	0.002481	0.001557	3.6e-05	0.004448			0.033698	0.010559		0	4.7e-05	0.010274		0.000736	0.002604	0.007481	0.002698	ICP-OES	Ion chromatography	thermal/optical carbon analyzer	Chen et al., 2015	Chen, P. L., Wang, T. J., Hu, X., Xie, M., Zhuang, B. L., Li, S.: A study of chemical mass balance source apportionment of fine particulate matter in Nanjing,Journal of Nanjing University(Natural Science), 51, 524-534, 2015.
CC	coal-fired power plants	Nanjing		PM2.1		resuspended sampling	0.00268	0.012335	0.093782			0.008578	0.021109				0.000328	0.026055		0.000273	0.000585	0.000188											0.000682	0.011423	0.007895	ICP-OES	Ion chromatography	thermal/optical carbon analyzer (DRI Model 2001)	Chen et al., 2017	Chen, P. L., Wang, T. J., Hu, X., Xie, M., Zhuang, B. L., Li, S.: A study of chemical mass balance source apportionment of fine particulate matter in Nanjing,Journal of Nanjing University(Natural Science), 51, 524-534, 2015.
CC	coal-fired power plants	Wuxi		PM2.1		resuspended sampling	0.007702	0.001971	0.025036			0.003498	0.018872				6.6e-05	0.007285		9.2e-05	5.4e-05	0.000441											0.002244	0.010082	0.035506	ICP-OES	Ion chromatography	thermal/optical carbon analyzer (DRI Model 2001)	Chen et al., 2017	Chen, P. L., Wang, T. J., Hu, X., Xie, M., Zhuang, B. L., Li, S.: A study of chemical mass balance source apportionment of fine particulate matter in Nanjing,Journal of Nanjing University(Natural Science), 51, 524-534, 2015.
CC	coal-fired power plants	Wuxi		PM2.1		resuspended sampling	0.003776	0.00672	0.071877			0.004838	0.103755				0.000985	0.00763		0.001049	0.000485	0.000762											0.000203	0.001038	0.013856	ICP-OES	Ion chromatography	thermal/optical carbon analyzer (DRI Model 2001)	Chen et al., 2017	Chen, P. L., Wang, T. J., Hu, X., Xie, M., Zhuang, B. L., Li, S.: A study of chemical mass balance source apportionment of fine particulate matter in Nanjing,Journal of Nanjing University(Natural Science), 51, 524-534, 2015.
CC	unknow	Beijing		PM10		dilution tunnel sampling	0.007538	0.00505	0.091032		0.252531	0.00733	0.0385	0.004867	9.9e-05	5.6e-05	0.00051	0.033938	7.8e-05	4.9e-05	9.5e-05	0.000173	4.4e-05	1e-06	0.091326	0.000121	0.091447						0.000283	0.000325	0.027221	X-ray fluorescence/GFAAS/AFS	Ion chromatography	thermal/optical carbon analyzer	Hua et al., 2006	Hua, L., Guo, J., Xu, Z. Y., Hu, Y. Q., Huang, Y., Zou, B. D.: Analysis of PM10 Source Profiles in Beijing, Environmental Monitoring in China, 22, 64-71, 2006.
CC	unknow	Shaoguan				resuspended sampling	0.02515	0.01152	0.15562		0.08912	0.02319	0.02114	0.00112	0.00021	0.00073	0.00026	0.04612	0.00023	6e-05	7e-05	0.00028	3e-05		0.08913		0.09933					0.00045		0.00016	0.00791	X-ray fluorescence	Ion chromatography	thermal/optical carbon analyzer (DRI Model 2001)	Luo et al., 2017	Luo, Y. H.: Study on the Source Profiles of Atmospheric Particulate Matters Based on the CMB Receptor Model, SICHUAN ENVIRONMENT, 36, 17-23, 2017.
CC	unknow	Rizhao				resuspended sampling	0.003422	0.005468	0.146915		0.187282	0.004704	0.075592	0.005715	3.2e-05	0.000181	0.000447	0.025773	5e-05	0.000116	3.9e-05	0.000112	5.3e-05		0.065159		0.201737					2e-06		0.000626	0.022426	ICP-OES	Ion chromatography	CHON elementar analysensysteme	Li et al., 2017	Li, W., Chen, C. D., Gong, M. Y., Cheng, Z. C.: CMB Receptor Model Analysis on Source of Particulate Material in Rizhao, Environmental Science and Management., 32, 45-49, 2007.
CC	unknow	Tai'an		PM10		download ash and direct plume sampling	0.025936	0.001247	0.113636		0.181599	0.00847	0.010891	0.003999	3.3e-05	5.9e-05	7.2e-05	0.012792	6e-05	0.000116	0.000331	0.0003	1.4e-05		0.10502		0.143287							0.000492	0.017678	ICP-AES	Ion chromatography	CHON elementar analysensysteme	Shan et al., 2004	Shan, M., Wang, X., Qi, H.: Source Apportionment of Inhalable Particulate Matter in Tai'an City, Journal of Taishan University, 26, 91-96, 2004.
CC	unknow	Chengdu	2001-2002	PM10		unknow	0.024	0.011	0.125		0.148	0.024	0.021	0.001	0	0.001	0	0.002	0	0	0	0	0		0.088		0.098					0		0	0.008	ICP-AES	Ion chromatography	SMT-2 thermal carbon analyzer	Wang et al., 2006	Wang, S. L., Chai, F. H., Zhou, L. D., Wang, Q. L.: Source Apportionment of Inhalable Particulate Matter in Chengdu, Scientia Geographica Sinica, 26, 717-721, 2006.

## Sheet: IE
Source	Sub-type	City	Year	Size	Fuel type	Sampling method	Na	Mg	Al	Si	K	Ca	Ti	V	Cr	Mn	Fe	Ni	Cu	Pb	Zn	As	Cd	OC	EC	TC	Ca2+	K+	Mg2+	F-	Cl-	NH4+	NO3-	SO42-	Elemental analysis	Ion analysis	OC/EC analysis	Reference	Note
IE	iron and steel		2014-2015	PM2.5		dilution tunnel sampling	0.0132	0.0359	0.0354	0.0354	0.0167	0.0767	0.014	0.0016	0.0015	0.0008	0.0929	0.0004	0.001	0.0007	0.004	0.0001		0.1644	0.0696		0.0245					0.0546	0.0478	0.1058	ICP-MS	Ion chromatography	thermal/optical carbon analyzer (DRI Model 2006A)	Liu et al., 2017	Liu, Y. Y., Zhang, W. J., Bai, Z. P., et al.: Characteristics of PM2. 5chemical source profiles of coal combustion and industrial process in China, Research of Environmental Sciences., 30, 1859-1868, 2017.
IE	aluminum roasting		2014-2015	PM2.5		dilution tunnel sampling	0.0084	0.033	0.1612	0.0226	0.0113	0.0154	0.005	0.0012	0.0011	0.0001	0.0545	0.0001	0.0002	0.0001	0.0005	0.0001		0.0877	0.0638		0.009					0.0267	0.0391	0.1481	ICP-MS	Ion chromatography	thermal/optical carbon analyzer (DRI Model 2007A)	Liu et al., 2017	Liu, Y. Y., Zhang, W. J., Bai, Z. P., et al.: Characteristics of PM2. 5chemical source profiles of coal combustion and industrial process in China, Research of Environmental Sciences., 30, 1859-1868, 2017.
IE	aluminum calcination		2014-2015	PM2.5		dilution tunnel sampling	0.0667	0.006	0.1266	0.0397	0.0082	0.0197	0.0008	0.0041	0.0005	0.0002	0.0102	0.0017	0.0001	0.001	0.0041	0		0.0176	0.0595		0.009					0.0513	0.0163	0.23	ICP-MS	Ion chromatography	thermal/optical carbon analyzer (DRI Model 2008A)	Liu et al., 2017	Liu, Y. Y., Zhang, W. J., Bai, Z. P., et al.: Characteristics of PM2. 5chemical source profiles of coal combustion and industrial process in China, Research of Environmental Sciences., 30, 1859-1868, 2017.
IE	brick furnace		2014-2015	PM2.5		dilution tunnel sampling	0.0051	0.0166	0.0462	0.1014	0.0075	0.1045	0.0031	0.0001	0.0005	0.0003	0.0552	0.0001	0.0002	0.0003	0.0009	0		0.1435	0.0209		0.0312					0.02267	0.01184	0.1013	ICP-MS	Ion chromatography	thermal/optical carbon analyzer (DRI Model 2009A)	Liu et al., 2017	Liu, Y. Y., Zhang, W. J., Bai, Z. P., et al.: Characteristics of PM2. 5chemical source profiles of coal combustion and industrial process in China, Research of Environmental Sciences., 30, 1859-1868, 2017.
IE	cement kiln head		2014-2015	PM2.5		dilution tunnel sampling	0.0066	0.0183	0.031	0.0943	0.0045	0.1227	0.0015	0.0001	0.0007	0.0006	0.0474	0.0001	0.0002	0.0045	0.0019	0.0001		0.047	0.0619		0.0339					0.0056	0.0073	0.1583	ICP-MS	Ion chromatography	thermal/optical carbon analyzer (DRI Model 2010A)	Liu et al., 2017	Liu, Y. Y., Zhang, W. J., Bai, Z. P., et al.: Characteristics of PM2. 5chemical source profiles of coal combustion and industrial process in China, Research of Environmental Sciences., 30, 1859-1868, 2017.
IE	cement kiln tail		2014-2015	PM2.5		dilution tunnel sampling	0.0032	0.0024	0.041	0.1211	0.0106	0.0054	0.0005	0.0001	0.0002	0.0001	0.0043	0	0.0029	0.0088	0.002	0		0.0383	0. 0090		0.004					0.0759	0.0017	0.2464	ICP-MS	Ion chromatography	thermal/optical carbon analyzer (DRI Model 2011A)	Liu et al., 2017	Liu, Y. Y., Zhang, W. J., Bai, Z. P., et al.: Characteristics of PM2. 5chemical source profiles of coal combustion and industrial process in China, Research of Environmental Sciences., 30, 1859-1868, 2017.
IE	iron and steel	Beijing		PM10		dilution tunnel sampling	0.001261	0.03414	0.018371	0.1348	0.003983	0.100929	0.0012	0.00014	0.000111	0.00077	0.2227	1e-05	2.4e-05	5.1e-05	9.7e-05	1.4e-05	0.000278	0.068991	2.9e-05	0.06902						0.000145	0.000207	0.015685	X-ray fluorescence/GFAAS/AFS	Ion chromatography	thermal/optical carbon analyzer	Hua et al., 2006	Hua, L., Guo, J., Xu, Z. Y., Hu, Y. Q., Huang, Y., Zou, B. D.: Analysis of PM10 Source Profiles in Beijing, Environmental Monitoring in China, 22, 64-71, 2006.
IE	iron and steel	Nanjing	2011-2012	PM2.5		resuspended sampling	0.033184	0.037682	0.049398		0.001463	0.219856	0.004289	6e-05	0.005025	0.002776	0.16993	0.002896	0.001761	0.000108	0.01594			0.110222	0.012333		0	3e-05	0.030517		0	0.000209	0.007373	0.005224	ICP-OES	Ion chromatography	thermal/optical carbon analyzer	Chen et al., 2015	Chen, P. L., Wang, T. J., Hu, X., Xie, M., Zhuang, B. L., Li, S.: A study of chemical mass balance source apportionment of fine particulate matter in Nanjing, Journal of Nanjing University(Natural Science), 51, 524-534, 2015.
IE	metallurgical dust	Shaoguan				resuspended sampling	0.00937	0.03767	0.05172	0.07814	0.01215	0.06172	0.00067	0.00023	0.00313	0.04031	0.31174	0.00062	0.00085	0.00382	0.04787	6e-05		0.07131	0.09716						0.00151		0.00023	0.00513	X-ray fluorescence	Ion chromatography	thermal/optical carbon analyzer(DRI Model 2001)	Luo et al., 2017	Luo, Y. H.: Study on the Source Profiles of Atmospheric Particulate Matters Based on the CMB Receptor Model, SICHUAN ENVIRONMENT., 36, 17-23, 2017.
IE	metallurgical dust	Chengdu	2001-2002	PM10		unknow	0.008	0.037	0.046	0.062	0.012	0.056	0.001	0	0.003	3	0.342	0.001	0.001	0.003	0.037	0		0.064		0.082					0.002		0	0.004	ICP-AES	Ion chromatography	SMT-2 thermal carbon analyzer	Wang et al., 2006	Wang, S. L., Chai, F. H., Zhou, L. D., Wang, Q. L.: Source Apportionment of Inhalable Particulate Matter in Chengdu, Scientia Geographica Sinica, 26, 717-721, 2006.
IE	metallurgical dust	Nanchang	2005	PM10		unknow		0.031588	0.01662			0.058133	0.000626			0.005012	0.348342			0.001526		0.000948													ICP-AES			Peng et al., 2008	Peng, X. L., He, Z. J.: Source apportionment of particulate matter PM10 in Luojia industrial Area of Nanchang City, Jiangxikexue, 26, 808-811, 2008.
IE	iron and steel(sintering)	6 cities in northern China		PM2.5		direct plume sampling	0.020007	0.001178	0.00112	0.001464	0.138629	0.165145	0.000263	0.000139	0.000236	0.000411	0.026593	0.000147	0.004301	0.033124	0.003647	1e-06	0.000354	0.060057	0.003169							0.089182	0.005228	0.130426	X-ray fluorescence	Ion chromatography	thermal/optical carbon analyzer(DRI Model 2001A)	Guo et al., 2017	Guo, Y. Y., Gao, X., Zhu, T. Y., Luo, L., Zheng, Y.: Chemical profiles of PM emitted from the iron and steel industry in northern China, Atmos. Environ., 150, 187-197, 2016.
IE	iron and steel(sintering)	6 cities in northern China		PM10		direct plume sampling	0.021614	0.00172	0.00151	0.002291	0.140073	0.139974	0.000514	0.00011	0.000425	0.000674	0.083294	0.000267	0.003643	0.030056	0.003707	1e-06	0.000537	0.049582	0.002286							0.076223	0.004915	0.123804	X-ray fluorescence	Ion chromatography	thermal/optical carbon analyzer(DRI Model 2001A)	Guo et al., 2017	Guo, Y. Y., Gao, X., Zhu, T. Y., Luo, L., Zheng, Y.: Chemical profiles of PM emitted from the iron and steel industry in northern China, Atmos. Environ., 150, 187-197, 2016.
IE	iron and steel(pelletizing)	6 cities in northern China		PM2.5		direct plume sampling	0.003199	0.002542	0.013345	0.025472	0.00339	0.036739	0.00339	0.00037	0.000442	0.003975	0.380058	0.000263	0.000251	0.000561	0.000155	0.00074	0.000585	0	0							0.019706	0.00208	0.368721	X-ray fluorescence	Ion chromatography	thermal/optical carbon analyzer(DRI Model 2001A)	Guo et al., 2017	Guo, Y. Y., Gao, X., Zhu, T. Y., Luo, L., Zheng, Y.: Chemical profiles of PM emitted from the iron and steel industry in northern China, Atmos. Environ., 150, 187-197, 2016.
IE	iron and steel(pelletizing)	6 cities in northern China		PM10		direct plume sampling	0.003582	0.002977	0.015818	0.029136	0.003653	0.042776	0.004865	0.000457	0.000696	0.005773	0.631871	0.000309	0.000309	0.000612	0.000206	0.000804	0.000735	0	0							0.011278	0.000561	0.142077	X-ray fluorescence	Ion chromatography	thermal/optical carbon analyzer(DRI Model 2001A)	Guo et al., 2017	Guo, Y. Y., Gao, X., Zhu, T. Y., Luo, L., Zheng, Y.: Chemical profiles of PM emitted from the iron and steel industry in northern China, Atmos. Environ., 150, 187-197, 2016.
IE	iron and steel(puddling)	6 cities in northern China		PM2.5		direct plume sampling	0.008848	0.002133	0.003256	0.009678	0.032481	0.025228	0.001581	0.000436	0.004238	0.007752	0.629337	0.001589	0.000503	0.00312	0.018334	8.6e-05	0.000976	0.040097	0.041656							0.022678	0.004864	0.070717	X-ray fluorescence	Ion chromatography	thermal/optical carbon analyzer(DRI Model 2001A)	Guo et al., 2017	Guo, Y. Y., Gao, X., Zhu, T. Y., Luo, L., Zheng, Y.: Chemical profiles of PM emitted from the iron and steel industry in northern China, Atmos. Environ., 150, 187-197, 2016.
IE	iron and steel(puddling)	6 cities in northern China		PM10		direct plume sampling	0.006373	0.002145	0.0031	0.010216	0.024263	0.026898	0.001909	0.000475	0.004248	0.006477	0.641883	0.001574	0.00055	0.002561	0.014323	6e-05	0.001403	0.042022	0.038903							0.017065	0.025653	0.065849	X-ray fluorescence	Ion chromatography	thermal/optical carbon analyzer(DRI Model 2001A)	Guo et al., 2017	Guo, Y. Y., Gao, X., Zhu, T. Y., Luo, L., Zheng, Y.: Chemical profiles of PM emitted from the iron and steel industry in northern China, Atmos. Environ., 150, 187-197, 2016.
IE	iron and steel(steelmaking)	6 cities in northern China		PM2.5		direct plume sampling	0.010554	0.006482	0.002559	0.011639	0.029684	0.069561	0.001617	0.000303	0.001758	0.025468	0.72668	0.00049	0.000407	0.004507	0.015646	1.9e-05	0.002358	0.002714	0							0.000288	0.000253	0.008001	X-ray fluorescence	Ion chromatography	thermal/optical carbon analyzer(DRI Model 2001A)	Guo et al., 2017	Guo, Y. Y., Gao, X., Zhu, T. Y., Luo, L., Zheng, Y.: Chemical profiles of PM emitted from the iron and steel industry in northern China, Atmos. Environ., 150, 187-197, 2016.
IE	iron and steel(steelmaking)	6 cities in northern China		PM10		direct plume sampling	0.011414	0.007378	0.002757	0.01232	0.022277	0.092782	0.001892	0.000662	0.001431	0.022859	0.640949	0.000399	0.000516	0.004425	0.013043	1.4e-05	0.002859	0.002082	0							0.000497	0.008394	0.080301	X-ray fluorescence	Ion chromatography	thermal/optical carbon analyzer(DRI Model 2001A)	Guo et al., 2017	Guo, Y. Y., Gao, X., Zhu, T. Y., Luo, L., Zheng, Y.: Chemical profiles of PM emitted from the iron and steel industry in northern China, Atmos. Environ., 150, 187-197, 2016.
IE	iron and steel(sintering)	Tangshan，Shijiazhuang，Handan		0.43-10μm		dilution tunnel sampling	0.021		0.015		0.006	0.025	0.024		0.001	0	0.172		0	0.001	0.001			0.128	0.014	0.142							0.003	0.228	(ICP-MS	Ion chromatography	thermal/optical carbon analyzer(DRI Model 2001A)	Jia et al., 2018	Jia, J., Cheng, S. Y., Yao, S., Xu, T. B., Zhang, T. T., Ma, Y. T., Wang, H. L., Duan, W. J.: Emission characteristics and chemical components of size-segregatedparticulate matter in iron and steel industry, Atmos. Environ., 182, 115-127, 2018.
IE	iron and steel(puddling)	Tangshan，Shijiazhuang，Handan		0.43-10μm		dilution tunnel sampling	0.026		0.013		0.03	0.021	0.087		0.002	0.006	0.264		0.002	0.002	0.002			0.07	0.023	0.023							0.03	0.093	(ICP-MS	Ion chromatography	thermal/optical carbon analyzer(DRI Model 2001A)	Jia et al., 2018	Jia, J., Cheng, S. Y., Yao, S., Xu, T. B., Zhang, T. T., Ma, Y. T., Wang, H. L., Duan, W. J.: Emission characteristics and chemical components of size-segregatedparticulate matter in iron and steel industry, Atmos. Environ., 182, 115-127, 2018.
IE	iron and steel(steelmaking)	Tangshan，Shijiazhuang，Handan		0.43-10μm		dilution tunnel sampling	0.017		0.049		0.006	0.033	0.045		0.003	0.001	0.272		0	0	0.002			0.071	0.017	0.017							0.016	0.115	(ICP-MS	Ion chromatography	thermal/optical carbon analyzer(DRI Model 2001A)	Jia et al., 2018	Jia, J., Cheng, S. Y., Yao, S., Xu, T. B., Zhang, T. T., Ma, Y. T., Wang, H. L., Duan, W. J.: Emission characteristics and chemical components of size-segregatedparticulate matter in iron and steel industry, Atmos. Environ., 182, 115-127, 2018.
IE	iron and steel(rolling)	Tangshan，Shijiazhuang，Handan		0.43-10μm		dilution tunnel sampling	0.067		0.013		0.003	0.024	0.015		0.01	0	0.175		0.002	0	0.005			0.077	0.016	0.016							0.034	0.186	(ICP-MS	Ion chromatography	thermal/optical carbon analyzer(DRI Model 2001A)	Jia et al., 2018	Jia, J., Cheng, S. Y., Yao, S., Xu, T. B., Zhang, T. T., Ma, Y. T., Wang, H. L., Duan, W. J.: Emission characteristics and chemical components of size-segregatedparticulate matter in iron and steel industry, Atmos. Environ., 182, 115-127, 2018.
IE	iron and steel	Nanjing		PM2.1		resuspended sampling	0.015548	0.080616	0.048706		0.080642	0.156917				0.001342	0.133887		0.002942	0.00068	0.002107			0.099983	0.014199							0.031514	0.154428	0.04502	ICP-OES	Ion chromatography	thermal/optical carbon analyzer(DRI Model 2001)	Chen et al., 2017	Chen, P. L., Wang, T. J., Dong, M., Kasoar, M., Han, Y., Xie, M., Li, S., Zhuang, B. L., Li, M. M., Huang, T.: Characterization of major natural and anthropogenic source profiles for size-fractionated PM in Yangtze River Delta, Sci. Total Environ., 598, 135-145, 2017, https://doi.org/10.1016/j.scitotenv.2017.04.106.
IE	iron and steel	Wuxi		PM2.1		resuspended sampling	0.008127	0.00511	0.034353		0.003067	0.035589				0.000232	0.067458		0.001301	7.1e-05	0.000192			0.248906	0.167699							0.001961	0.04094	0.015443	ICP-OES	Ion chromatography	thermal/optical carbon analyzer(DRI Model 2001)	Chen et al., 2017	Chen, P. L., Wang, T. J., Dong, M., Kasoar, M., Han, Y., Xie, M., Li, S., Zhuang, B. L., Li, M. M., Huang, T.: Characterization of major natural and anthropogenic source profiles for size-fractionated PM in Yangtze River Delta, Sci. Total Environ., 598, 135-145, 2017, https://doi.org/10.1016/j.scitotenv.2017.04.106.
IE	garbage-fired plant	Wuxi		PM2.1		resuspended sampling	0.035996	0.010124	0.017449		0.032602	0.103767				0.000229	0.005292		0.001144	0.001087	0.017121			0.257159	0.167914							0.005739	0.049018	0.012869	ICP-OES	Ion chromatography	thermal/optical carbon analyzer(DRI Model 2001)	Chen et al., 2017	Chen, P. L., Wang, T. J., Dong, M., Kasoar, M., Han, Y., Xie, M., Li, S., Zhuang, B. L., Li, M. M., Huang, T.: Characterization of major natural and anthropogenic source profiles for size-fractionated PM in Yangtze River Delta, Sci. Total Environ., 598, 135-145, 2017, https://doi.org/10.1016/j.scitotenv.2017.04.106.
IE	cement industry	Wuxi		PM2.1		resuspended sampling	0.030736	0.013768	0.024484		0.006645	0.15473				0.000393	0.008249			0.000262	0.036334			0.162542	0.034534							0.007522	0.005771	0.011869	ICP-OES	Ion chromatography	thermal/optical carbon analyzer(DRI Model 2001)	Chen et al., 2017	Chen, P. L., Wang, T. J., Dong, M., Kasoar, M., Han, Y., Xie, M., Li, S., Zhuang, B. L., Li, M. M., Huang, T.: Characterization of major natural and anthropogenic source profiles for size-fractionated PM in Yangtze River Delta, Sci. Total Environ., 598, 135-145, 2017, https://doi.org/10.1016/j.scitotenv.2017.04.106.
IE	ceramic industry	Wuxi		PM2.1		resuspended sampling	0.025613	0.011657	0.006655		0.00707	0.199196					0.027494				0.111933			0.221539	0.027025							0.003623		0.004397	ICP-OES	Ion chromatography	thermal/optical carbon analyzer(DRI Model 2001)	Chen et al., 2017	Chen, P. L., Wang, T. J., Dong, M., Kasoar, M., Han, Y., Xie, M., Li, S., Zhuang, B. L., Li, M. M., Huang, T.: Characterization of major natural and anthropogenic source profiles for size-fractionated PM in Yangtze River Delta, Sci. Total Environ., 598, 135-145, 2017, https://doi.org/10.1016/j.scitotenv.2017.04.106.
IE	textile industry	Wuxi		PM2.1		resuspended sampling	0.10863	0.034363	0.007085		0.009241	0.136571					0.009836				0.075609			0.136491	0.0166							0.002529	0.042268	0.005455	ICP-OES	Ion chromatography	thermal/optical carbon analyzer(DRI Model 2001)	Chen et al., 2017	Chen, P. L., Wang, T. J., Dong, M., Kasoar, M., Han, Y., Xie, M., Li, S., Zhuang, B. L., Li, M. M., Huang, T.: Characterization of major natural and anthropogenic source profiles for size-fractionated PM in Yangtze River Delta, Sci. Total Environ., 598, 135-145, 2017, https://doi.org/10.1016/j.scitotenv.2017.04.106.
IE	electroplating	Wuxi		PM2.1		resuspended sampling	0.004936	0.004601	0.105571		0.003415	0.072882					0.003622			0.000223	0.005926			0.088143	0.012186							0.001779	0.012223	0.005181	ICP-OES	Ion chromatography	thermal/optical carbon analyzer(DRI Model 2001)	Chen et al., 2017	Chen, P. L., Wang, T. J., Dong, M., Kasoar, M., Han, Y., Xie, M., Li, S., Zhuang, B. L., Li, M. M., Huang, T.: Characterization of major natural and anthropogenic source profiles for size-fractionated PM in Yangtze River Delta, Sci. Total Environ., 598, 135-145, 2017, https://doi.org/10.1016/j.scitotenv.2017.04.106.

## Sheet: VE
Source	Sub-type	City	Year	Size	Fuel type	Sampling method	Na	Mg	Al	Si	K	Ca	Ti	V	Cr	Mn	Fe	Ni	Cu	Pb	Zn	As	Cd	OC	EC	Ca2+	K+	Mg2+	F-	Cl-	NH4+	NO3-	SO42-	Elemental analysis	Ion analysis	OC/EC analysis	Reference	Note
VE	gasoline	Beijing	2011	PM10	gasoline	dilution tunnel sampling	0.02725	0.00665	0.02281	0.02047	0.01267	0.06277	0.000512	6.9e-05	0.000467	0.00297	0.02047	0.00101	0.00101		0.00842	7.7e-05	2.1e-05	0.26849	0.11488						0.08095	0.07856	0.03414	ICP-OES	Ion chromatography	thermal optical carbon analyzer	Shi et al, 2014	Shi, A. J., Ma, J. W., Geng, C. M., Meng, T., and Kong, S. F.: Characteristics of Chemical Composition of Particulate Matter ( PM10) from Beijing Vehicle, China Environmental Monitoring, 30, 44-49, 2014.
VE	gasoline	Beijing	2011	PM10	gasoline	dilution tunnel sampling	0.01767	0.00538	0.01467	0.01617	0.0097	0.05223	0.00042	5.8e-05	0.000429	0.00313	0.01789	0.000949	0.000833		0.00751	7.9e-05	1.9e-05	0.3116	0.08967						0.08302	0.07713	0.03718	ICP-OES	Ion chromatography	thermal optical carbon analyzer	Shi et al, 2014	Shi, A. J., Ma, J. W., Geng, C. M., Meng, T., and Kong, S. F.: Characteristics of Chemical Composition of Particulate Matter ( PM10) from Beijing Vehicle, China Environmental Monitoring, 30, 44-49, 2014.
VE	light-duty diesel	Beijing	2011	PM10	gasoline	dilution tunnel sampling	0.03292	0.00486	0.00633	0.00969	0.00905	0.07788	0.000254	0.000233	0.000265	0.000496	0.01007	0.000167	0.000517		0.00897	3.4e-05	7.9e-05	0.20983	0.34589						0.00926	0.0121	0.01193	ICP-OES	Ion chromatography	thermal optical carbon analyzer	Shi et al, 2014	Shi, A. J., Ma, J. W., Geng, C. M., Meng, T., and Kong, S. F.: Characteristics of Chemical Composition of Particulate Matter ( PM10) from Beijing Vehicle, China Environmental Monitoring, 30, 44-49, 2014.
VE	heavy-duty diesel	Beijing	2011	PM10	gasoline	dilution tunnel sampling	0.0366	0.00993	0.00581	0.01212	0.01574	0.13518	0.000423	0.000324	0.000133	0.000524	0.00746	0.000333	0.000455		0.01316	3e-05	8.3e-05	0.22621	0.20712						0.0195	0.02766	0.02276	ICP-OES	Ion chromatography	thermal optical carbon analyzer	Shi et al, 2014	Shi, A. J., Ma, J. W., Geng, C. M., Meng, T., and Kong, S. F.: Characteristics of Chemical Composition of Particulate Matter ( PM10) from Beijing Vehicle, China Environmental Monitoring, 30, 44-49, 2014.
VE	diesel	Beijing	2011	PM10	gasoline	dilution tunnel sampling	0.0265	0.00471	0.00952	0.01082	0.00633	0.05382	0.000361	3.3e-05	0.000508	0.000366	0.01139	0.00042	0.0013		0.00798	9e-06	2.5e-05	0.17614	0.40619						0.0103	0.01068	0.01302	ICP-OES	Ion chromatography	thermal optical carbon analyzer	Shi et al, 2014	Shi, A. J., Ma, J. W., Geng, C. M., Meng, T., and Kong, S. F.: Characteristics of Chemical Composition of Particulate Matter ( PM10) from Beijing Vehicle, China Environmental Monitoring, 30, 44-49, 2014.
VE	heavy-duty diesel	Tianjin	2008	Diesel particulate matter	diesel	direct sampling	0.013	0.0099	0.013	0.018	0.0012	0.044	0.00066	1.7e-05	0.00099	0.00022	0.0095	9.4e-05	0	0	0.00067	1.7e-05	1.6e-05											ICP-9000	Ion chromatography	thermal/optical reﬂectance (TOR)	Jin et al, 2017	Jin, T. S., Lu, K. B., Liu, S. X., Zhao, S., Qu, L., and Xu, X. H.: Chemical Characteristics of Particulate Matter Emission from a Heavy-Duty Diesel Engine Using ETC Cycle Dynamometer Test, Aerosol Air Qual. Res., 17, 406–411, 2017.
VE	heavy-duty diesel			PM2.5	diesel	dilution tunnel sampling	0.00706	0.00149			0.00349	0.00893	9.1e-06		1.04e-05	9.6e-06	6e-05	4.02e-06	2.8e-06		2.5e-06				0.0061203	8.93e-05	3.49e-05	1.49e-05		4.85e-05	1.42e-05	7.03e-05	0.0001123	ICP-MS	Ion chromatography	thermal optical carbon analyzer	Zhang et al, 2015	Zhang, Y. Z., Yao, Z. L., Shen, X. B., Liu, H., He, K.: Chemical characterization of PM2.5 emitted from heavy-diesel trucks in China, Atmos. Environ., 122, 885-891, 2015.
VE	heavy-duty diesel			PM2.5	diesel	dilution tunnel sampling	0.00591	0.0011			0.00304	0.00628	2.04e-05		1.05e-05	5.4e-06	6.89e-05	1.08e-05	3.4e-06		4.2e-06				0.0059346	6.28e-05	3.04e-05	1.1e-05		5.99e-05	1.31e-05	5.83e-05	0.0001078	ICP-MS	Ion chromatography	thermal optical carbon analyzer	Zhang et al, 2015	Zhang, Y. Z., Yao, Z. L., Shen, X. B., Liu, H., He, K.: Chemical characterization of PM2.5 emitted from heavy-diesel trucks in China, Atmos. Environ., 122, 885-891, 2015.
VE	heavy-duty diesel	Chongqing		PM2.5	diesel	dilution tunnel sampling	0.0059	0.0005	0.0011			0.0057					0.003				0.0009			0.001927	0.004287	0.0082	0.0045	0.0016		0.0025	0.0287	0.0193	0.0885	ICP-AES	Ion chromatography	thermal optical carbon analyzer	Wang et al，2015	Wang, G., Lang, J. L., Cheng, S. Y., Yao, S, and Wang, X. Q.: Characteristics of PM2.5 and hydrocarbon emitted from heavy-duty diesel vehicle, China Environmental Science, 35, 3581-3587, 2015.
VE	heavy-duty diesel	Chongqing		PM2.5	diesel	dilution tunnel sampling	0.0069	0.0004	0.0027			0.0058					0.0036				0.0021			0.001622	0.004086	0.0062	0.006	0.0022		0.0057	0.0222	0.0273	0.0845	ICP-AES	Ion chromatography	thermal optical carbon analyzer	Wang et al，2015	Wang, G., Lang, J. L., Cheng, S. Y., Yao, S, and Wang, X. Q.: Characteristics of PM2.5 and hydrocarbon emitted from heavy-duty diesel vehicle, China Environmental Science, 35, 3581-3587, 2015.
VE	heavy-duty diesel	Chongqing		PM2.5	diesel	dilution tunnel sampling	0.0046	0.0003	0.0016			0.0077					0.0027				0.0031			0.001996	0.003887	0.0062	0.005	0.0028		0.0039	0.0397	0.0191	0.0764	ICP-AES	Ion chromatography	thermal optical carbon analyzer	Wang et al，2015	Wang, G., Lang, J. L., Cheng, S. Y., Yao, S, and Wang, X. Q.: Characteristics of PM2.5 and hydrocarbon emitted from heavy-duty diesel vehicle, China Environmental Science, 35, 3581-3587, 2015.
VE	gasoline	Xining	2010	PM10	gasoline	dilution tunnel sampling	0.0051	0.0033	0.0386	0.033	0.0031	0.0175	0.0009	0	0.0003	0.0004	0.0071	0.0006	0.0014		0.0016	0.0001	0	0.4378	0.0238	0.0371	0	0.0063	0.0031	0.0047		0.0034	0.0609	ICP-MS,ICP-OES	Ion chromatography	thermal/optical reﬂectance (TOR)	Han et al, 2014	Han, J. B., Han, B., Li, P. H., Kong, S. F., Bai, Z. P., Han, D. H., Dou, X. Y., and Zhao, X. D.: Chemical Characteriations of PM10 Profiles for Major Emission Sources in Xining, Nortewestern China, Aerosol Air Qual. Res., 14, 1017-1027, 2014.
VE	diesel and gasoline	Xining	2010	PM10	diesel and gasoline	dilution tunnel sampling	0.0081	0.0063	0.0545	0.0239	0.0055	0.0118	0.0004	0	0.0004	0.0012	0.0082	0.0007	0.0046		0.0048	0.0001	0	0.2275	0.1878	0.0759	0	0.00141	0.0065	0.0013		0.0181	0.0801	ICP-MS,ICP-OES	Ion chromatography	thermal/optical reﬂectance (TOR)	Han et al, 2014	Han, J. B., Han, B., Li, P. H., Kong, S. F., Bai, Z. P., Han, D. H., Dou, X. Y., and Zhao, X. D.: Chemical Characteriations of PM10 Profiles for Major Emission Sources in Xining, Nortewestern China, Aerosol Air Qual. Res., 14, 1017-1027, 2014.
VE	diesel and gasoline	Taiwan	2005	PM10	diesel and gasoline	dilution tunnel sampling	0.0042	0.008	0.0342		0.0105	0.0056		0.000127	0.000403	0.000786	0.0391	8.2e-05	0.000609	0.00655	0.00476	0.000115	7.5e-05						0.000437	0.000198			0.1542	ICP-AES	Ion chromatography	thermo-optical carbon analyzer	Chiang et al, 2009	Chiang, H. L., and Huang, Y. S.: Particulate matter emissions from on-road vehicles in a freeway tunnel study, Atmos. Environ., 43, 4014-4022, 2009.
VE	diesel and gasoline	Kaifeng	2009	PM10	diesel and gasoline	direct sampling	0.0104	0.0009	0.0365	0.0722	0.0087	0.0001	0.0002	0.0001	0.0002	0.0426	0.0001	0.0002	0.0006	0	0	8e-05	0	0.371	30.3					0.0088		0.0171	0.0857				Wu et al, 2009	Wu, L., Feng, Y. C., Wu, J. H., Zhu, T., Bi, X. H., Han, Bo., Yang, W. H., and Yang, Z. Q.: Secondary organic carbon quantification and source apportionment of PM10 in Kaifeng, China, Environmental Sciences, 21, 1353-1362, 2009.
VE	diesel and gasoline	Changzhou		PM2.5	diesel and gasoline		0.003	0.0022	0.0027	0.0069	0.0023	0.006	0.001	0.0003	0.0001	0.0002	0.0118	0.0001	0.0008	0.0003	0.0022			0.3168	0.1819						0.0113	0.0077	0.0387	ICP-AES	Ion chromatography	thermo-optical carbon analyzer	Teng et al, 2015	Teng, J. Q., Wang, W., Jiang, S. J., Cheng, Z., and Xue, Y. G.: Study on the Source Profiles of PM2.5 Major Emissions in Changzhou, Environ. Sci. Technol., 28, 56-60, 2015.
VE	diesel and gasoline	Chengdu	2001	PM10	diesel and gasoline	direct sampling	0.003	0.002	0.003	0.007	0.002	0.006	0.001	0	0	0	0.012	0	0.001	0	0.002	0		0.517	0.3823					0.004		0.008	0.039	ICP-AES	Ion chromatography	thermo-optical carbon analyzer	Wang et al, 2006	Wang, S. L., Chai, F., Zhou, D. L., and Wang, Q. L.: Source analysis of air inhalational particles in Chengdu city, Scientia Geographica Sinica., 26, 717-721. 2006.
VE	diesel and gasoline	Nanjing		PM10	diesel and gasoline	direct sampling	0.00296	0.00219	0.00266	0.00694	0	0.00231												0.51677	0.38193					0.00396		0.00774	0.03872	ICP-9000	Ion chromatography	thermo-optical carbon analyzer	Rui et al, 2008	Rui, D. M., Chen, J. J., and Feng, Y, C.: Study on source apporionment of ambient air PM10 in Nanjing, Environmental science and management, 33, 56-61, 2008.
VE	diesel and gasoline	Taian		PM10	diesel and gasoline	direct sampling	0.002964	0.00219	0.002655	0.006935	0.002314	0.00599	0.001011	0.000334	0.000134	0.000217	0.01184	7.8e-05	0.000796	0.000324	0.002157	8e-05		0.516767	0.38193							0.03872	0.000958	ICP-9000	Ion chromatography	CHON Elemental analyzer	Shan et al, 2004	Shan, M., Wang, X., and Qi, H.: Study of source apportionment for air Particulate Matter( PM10) in Tai' an city, Journal of Taishan university., 26, 91-96, 2004.
VE	diesel and gasoline	Tianjin	2011	PM2.5	diesel and gasoline		0.0121	0.0266	0.0509	0.0799	0.0068	0.0931	0.0011	0	0.0004	0.0011	0.023	0.0001	0.0013	0.0008	0.0045			0.0976	0.1174							0.0552	0.0848	ICP-AES	Ion chromatography	thermo-optical carbon analyzer	Wei et al, 2012	Wei, X., BI, X. H., Dong, H. Y., Chen, K., Sun, R., and Feng, Y. C.: Characteristics and sources of particulate matter during hazy and non-hazy episodes in Tianjin City in summer, Research of Environmental Sciences., 25, 1193-1200, 2012.
VE	diesel and gasoline	Wuxi	2005	PM10	diesel and gasoline	sampling at underground parking lot	0.0049	0.0029	0.0024	0.0067	0.0024	0.0227	0.0048		0.0001	1e-05	0.0048	0.0003	0.0001	0.0001	0.0023			0.669	0.1524					0.0148		0.0142	0.0183	ICP-9000	Ion chromatography	Elemental analyzer	Han et al, 2009	Han, B., Feng, Y., C., Bi, X. H., Xue, Y. H., Wu, J. H., Zhu, T., Ding, J. Q., and Du, Y. X.: Source apportionment of ambient PM10 in urban area of Wuxi city, Reaearch of Environmental Sciences., 22, 35-39, 2009.
VE	diesel and gasoline	Changzhi	2008-2009	PM10	diesel and gasoline		0.00296	0.00219	0.00266	0.00694	0.00231	0.00599	0.00101	0.00033	0.00013	0.00022	0.01184	8e-05	0.0008	0.00032	0.00216	0		0.5167	0.382					0.00396		0.00774	0.03872	ICP-AES	Ion chromatography	thermo-optical carbon analyzer	Zhang et al, 2012	Zhang, J. Q., Mou, L., Bai, H. L., Wang, Y., Liu, X. F., and Song, C. F.: Study on source apportionment of PM10 in air environment of Changzhi, Shanxi. Journal of Shanxi University (Nat, Sci, Ed.)., 35, 737-742, 2012.
VE	diesel and gasoline	Shenzhen		PM10	diesel and gasoline	tunnel experiment	0.01709	0.00086	0.03651	0.07221	0.00949	0.00871	7e-05	0.00016	6e-05	0.00017	0.04258	5e-05	0.00024	0	0.00061			0.3705	0.3036								0.0857				Hao et al, 2012	Hao, M. T., Wei, L. Y., Li, Y., and Gao, J.: Comparative Study on Particulate Matters Chemical Source Profile of Vehicle Exhaust, Environmental monitoring management and technology., 24, 23-26, 2012.
VE	diesel and gasoline	Wuxi		PM10	diesel and gasoline	sampling at underground parking lot	0.0049	0.0029	0.0024	0.0067	0.0024	0.0227	0.0048	0	0.0001	0.0048	0.0048	0.0003	0.0001	0.0001	0.0023			0.669	0.1624								0.0183				Hao et al, 2012	Hao, M. T., Wei, L. Y., Li, Y., and Gao, J.: Comparative Study on Particulate Matters Chemical Source Profile of Vehicle Exhaust, Environmental monitoring management and technology., 24, 23-26, 2012.
VE	diesel and gasoline	Jinan		PM10	diesel and gasoline	traffic intersection sampling	0.00495	6e-05	0.00237	0.0067	0.00285	9e-05	1e-05	0.00226	0.00026	0.00243	0.00243	0.00012	0.00482	0	0.02269			0.3686	0.1628								0.01829				Hao et al, 2012	Hao, M. T., Wei, L. Y., Li, Y., and Gao, J.: Comparative Study on Particulate Matters Chemical Source Profile of Vehicle Exhaust, Environmental monitoring management and technology., 24, 23-26, 2012.
VE	diesel and gasoline	Handan		PM10		direct sampling	0.0029	0.0021	0.0026	0.0069	0.0023	0.0059	0.001	0.0003	0.0001	0.0002	0.0018	0.0003	0.0008	0.0004	0.0022			0.5105	0.3882					0.0009		0.0077	0.0387	X-ray fluorescence spectrometer	Ion chromatography	Pyrolytic carbon analyzer	Dong, 2008	Dong, H. L.: Source Apportionment of Atmospheric Inhalable Particulate Matter and Polycyclic Aromatic Hydrocarbons in Handan City, Tianjin University PhD thesis., 2008.
VE	diesel and gasoline	Jinan		PM2.5	diesel and gasoline	direct sampling	0.004946		0.002374	0.006697	0.00285	0.000139	1.2e-05	0.002258	8.9e-05	0.000263	0.002434	0.00012	0.000139	0	0.022691	0		0.368627	0.152762					0.003958		0.007738	0.018288	ICP-OES	Ion chromatography	Elemental analyzer	Wen, 2009	Wen, X. X.: Study on the pollution characteristics of airborne fine particulate matter (PM 10 and PM 2.5) in Jinan, Shandong University Master's Thesis., 2009.
VE	diesel and gasoline			TSP				0.000215	0.00027	0.000695	0.004601	0.010205	0.000308	3.4e-05	0.000273	0.000443	0.01154	0.000285	0.000765	0.00254	0.001087	0.000405	6e-06														Kong et al, 2013	Kong, S. F., and Bai, Z. P.: Progress on the composition profiles for particulate matter from vehicle emission in source apportionment, Environ. Sci. Technol., 36, 26-33, 2013.
VE	diesel	Wuxi		PM10	diesel	Direct sampling	0.023972	0.008497	0.068743		0.009047	0.010175				0.000239	0.015668		0.000341	0.000169	0.00198			0.496589	0.151446					0.013649	0.030048	0.018631	0.099185	ICP-OES	Ion chromatography	thermal/optical carbon analyzer	Chen et al,2017	Chen, P. L., Wang, T. J., Dong, M., Matthew, K., Han, Y., Xie, M., Li, S., Zhuang, B. L., Li, M. M., and Huang, T. N.: Characterization of major natural and anthropegenic source profiles for size-fractionated PM in Yangtze River Delta, Sci. Total Environ., 598, 135-145, 2017.
VE	gasoline	Wuxi		PM10	gasolline	Direct sampling	0.011628	0.013426	0.075313		0.004692	0.024236				0.014773	0.011948		0.000135	0.000575	0.001191			0.305401	0.106527					0.00038	0.000822	0.003628	0.001595	ICP-OES	Ion chromatography	thermal/optical carbon analyzer	Chen et al,2017	Chen, P. L., Wang, T. J., Dong, M., Matthew, K., Han, Y., Xie, M., Li, S., Zhuang, B. L., Li, M. M., and Huang, T. N.: Characterization of major natural and anthropegenic source profiles for size-fractionated PM in Yangtze River Delta, Sci. Total Environ., 598, 135-145, 2017.
VE	gasoline	Wuxi		PM10	gasolline	Direct sampling	0.034208	0.005954	0.051551		0.01209	0.006997				0.000199	0.012364		0.000214	0.000153	0.001571			0.480983	0.048569					0.006505	0.055711	0.058563	0.028479	ICP-OES	Ion chromatography	thermal/optical carbon analyzer	Chen et al,2017	Chen, P. L., Wang, T. J., Dong, M., Matthew, K., Han, Y., Xie, M., Li, S., Zhuang, B. L., Li, M. M., and Huang, T. N.: Characterization of major natural and anthropegenic source profiles for size-fractionated PM in Yangtze River Delta, Sci. Total Environ., 598, 135-145, 2017.
VE	diesel and gasoline	Shanghai	1998	TSP	diesel and gasoline		0.00404	0.00649	0.0251		0.00629	0.05859	0.0016	0.0001		0.00062	0.01971	0.0001	0.00052	0.0064	0.00127	0.0001												ICPS			Jiong et al, 2001	Jiong, S., John, A., D., Andrew, P. M., Li, Z. Y., and Nu, Y.: Determining the sources of atmospheric particles in Shanghai, China, from magnetic and geochemical properties, Atmos. Environ., 35, 2615-2625, 2001.
VE	diesel and gasoline	Longyan	2009-2010	PM10	diesel and gasoline	Collecting exhaust pipe from motor vehicles	0.00107581	0.00066	0.0555882		0.00502	0.096071	0.002129	1.27e-05	0.0002	0.01117		9.2e-05	0.000147	5.65e-05	0.002166	3.05e-05												X-ray fluorescence spectroscopy			Hou, 2012	Hou, J.: Study on improved source apportionment of PM10 in urban atmosphere, Master's thesis of Jilin University., 2012.
VE	diesel and gasoline	Shaoguan		TSP	diesel and gasoline	Collecting ground vehicle exhaust dust on main traffic sections	0.00297	0.00224	0.00161	0.00711	0.00237	0.00614	0.00103	0.00031	0.00014	0.00028	0.00192	0.00078	0.00083	0.05078	0.00217	9e-05		0.51038	0.39064					0.00461		0.00814	0.03917	ICP, XRF	Ion chromatography	thermal/optical carbon analyzer	Luo, 2006	Luo, Y, H.: Study on the geochemical characteristics and source apportment of atmospheric particles in Shaoguan ciry, Zhongnan University PhD thesis. 2006.
VE	gasoline	Wuxi		PM10	gasoline	Direct sampling	0.0342		0.0516		0.0121	0.007		0.0008			0.0124							0.481	0.0486					0.0065	0.0557	0.0586	0.0285	ICP-MS	Ion chromatography	thermal optical carbon analyzer	Chen et al, 2017	Chen, P. L., Xie, X. D., Wang, T. J., Du, Y. X., Dong, M., and Zou, H.: A study of chemical mass balance source apportionment of size-fractionated particulate matter in Wuxi, Chinese Meteorological Society. 34th Annual Meeting of the Chinese Meteorological Society S9 Proceedings of Atmospheric Composition and Weather, Climate Change and Environmental Impacts., 21, 2017.
VE	diesel	Wuxi		PM10	diesel	Direct sampling	0.024		0.0687		0.009	0.0102		0.0011			0.0157							0.4966	0.1514					0.0136	0.03	0.0186	0.0992	ICP-MS	Ion chromatography	thermal optical carbon analyzer	Chen et al, 2017	Chen, P. L., Xie, X. D., Wang, T. J., Du, Y. X., Dong, M., and Zou, H.: A study of chemical mass balance source apportionment of size-fractionated particulate matter in Wuxi, Chinese Meteorological Society. 34th Annual Meeting of the Chinese Meteorological Society S9 Proceedings of Atmospheric Composition and Weather, Climate Change and Environmental Impacts., 21, 2017.

## Sheet: FD
Source	Sub-type	City	Year	Size	Fuel type	Sampling method	Na	Cl	Br	Mg	Al	S	Si	K	P	Ca	Ti	V	Cr	Mn	Fe	Ni	Cu	Pb	Zn	As	Cd	Co	Rb	Sr	Sn	Sb	Ba	OC	EC	TC	Na+	Ca2+	K+	Mg2+	F-	Cl-	NH4+	NO2-	NO3-	SO42-	Elemental analysis	Ion analysis	OC/EC analysis
FD	RD	Xi'an		PM2.5	-	direct sampling	0.017801	0.002492	2.6e-05		0.036962	0.005311	0.0734	0.021055		0.101617	0.00354	9.1e-05	0.000126	0.000953	0.040571	4.6e-05	0.000154	0.000315	0.001022			9.9e-05	0.000109	0.000397	0.000163	7e-05	0.001325					0.056984	0.003398	0.003554		0.008277			0.012042	0.02258	Energy Disper-sive X-Ray Fluorescence (ED-XRF) spectrometry (Epsilon 5 ED-XRF, PANalytical B. V., the Netherlands)	Ion chromatography (IC, Dionex 500, Dionex Corp, Sunnyvale, California, United States)
FD	RD	Yinchuan		PM2.5	-	direct sampling	0.031148	0.005773	3.1e-05		0.026867	0.009414	0.033052	0.015102		0.082997	0.002318	5.1e-05	0.000102	0.00082	0.026599	3e-05	0.000151	0.000191	0.000441			6.3e-05	4.7e-05	0.000424	0.00016	0.000112	0.000938					0.071627	0.003713	0.005601		0.022262			0.00625	0.049618	Energy Disper-sive X-Ray Fluorescence (ED-XRF) spectrometry (Epsilon 6 ED-XRF, PANalytical B. V., the Netherlands)	Ion chromatography (IC, Dionex 501, Dionex Corp, Sunnyvale, California, United States)
FD	RD	Lanzhou		PM2.5	-	direct sampling	0.021105	0.004228	8e-06		0.020524	0.004046	0.046117	0.017325		0.076829	0.002701	6.6e-05	9.7e-05	0.000778	0.033765	6.5e-05	0.000133	0.000187	0.000486			7.8e-05	7.2e-05	0.000321	8.3e-05	5.3e-05	0.000825					0.058596	0.003496	0.004562		0.013226			0.003981	0.015833	Energy Disper-sive X-Ray Fluorescence (ED-XRF) spectrometry (Epsilon 7 ED-XRF, PANalytical B. V., the Netherlands)	Ion chromatography (IC, Dionex 502, Dionex Corp, Sunnyvale, California, United States)
FD	RD	Beijing		PM2.5	-	direct sampling	0.014999	0.00111	1.8e-05		0.023517	0.002171	0.077519	0.010944		0.056891	0.002605	5.4e-05	0.0001	0.000643	0.026062	2.8e-05	0.000139	0.000158	0.000607			6.5e-05	5.1e-05	0.000251	9.9e-05	8.8e-05	0.000871					0.056588	0.001693	0.001408		0.002989			0.005113	0.01061	Energy Disper-sive X-Ray Fluorescence (ED-XRF) spectrometry (Epsilon 8 ED-XRF, PANalytical B. V., the Netherlands)	Ion chromatography (IC, Dionex 503, Dionex Corp, Sunnyvale, California, United States)
FD	RD	Tianjin		PM2.5	-	direct sampling	0.01321	0.00305	1.7e-05		0.020022	0.003308	0.054872	0.010291		0.042959	0.002147	4.7e-05	9.3e-05	0.00061	0.025491	3e-05	0.000141	0.000147	0.000808			5.2e-05	5.3e-05	0.000194	0.000104	4.9e-05	0.0009					0.038287	0.00179	0.001873		0.00894			0.003843	0.017404	Energy Disper-sive X-Ray Fluorescence (ED-XRF) spectrometry (Epsilon 9 ED-XRF, PANalytical B. V., the Netherlands)	Ion chromatography (IC, Dionex 504, Dionex Corp, Sunnyvale, California, United States)
FD	RD	Baoding		PM2.5	-	direct sampling	0.007283	0.000628	7e-06		0.030772	0.002552	0.039103	0.010871		0.05489	0.002598	6.4e-05	7.7e-05	0.000603	0.028015	2.5e-05	0.000106	0.000147	0.000664			6.9e-05	6.1e-05	0.000212	5.9e-05	3.6e-05	0.000724					0.038524	0.001216	0.001612		0.001508			0.002501	0.011543	Energy Disper-sive X-Ray Fluorescence (ED-XRF) spectrometry (Epsilon 10 ED-XRF, PANalytical B. V., the Netherlands)	Ion chromatography (IC, Dionex 505, Dionex Corp, Sunnyvale, California, United States)
FD	RD	Shijiazhuang		PM2.5	-	direct sampling	0.013508	0.000978	1.7e-05		0.023039	0.0033	0.055928	0.011704		0.070215	0.002267	5.5e-05	8.7e-05	0.000617	0.026912	2e-05	0.000102	0.00015	0.000449			6.2e-05	6.1e-05	0.00025	0.000106	3.3e-05	0.000818					0.003445	0.005354	0.00425		0.003445			0.00354	0.017486	Energy Disper-sive X-Ray Fluorescence (ED-XRF) spectrometry (Epsilon 11 ED-XRF, PANalytical B. V., the Netherlands)	Ion chromatography (IC, Dionex 506, Dionex Corp, Sunnyvale, California, United States)
FD	RD	Handan		PM2.5	-	direct sampling	0.007528	0.00075	1e-05		0.025655	0.002083	0.0665	0.009669		0.071696	0.001958	7.1e-05	6.7e-05	0.000658	0.023743	2.4e-05	6.3e-05	0.000102	0.00029			4.9e-05	4.9e-05	0.000167	6.6e-05	2.3e-05	0.000573					0.036087	0.001596	0.000882		0.002435			0.002524	0.009426	Energy Disper-sive X-Ray Fluorescence (ED-XRF) spectrometry (Epsilon 12 ED-XRF, PANalytical B. V., the Netherlands)	Ion chromatography (IC, Dionex 507, Dionex Corp, Sunnyvale, California, United States)
FD	RD	Harbin		PM2.5	-	direct sampling	0.009772	0.000594	1.3e-05		0.022835	0.001511	0.107066	0.009906		0.042768	0.002132	4.6e-05	5.9e-05	0.000741	0.021497	1.9e-05	0.000102	0.000126	0.000256			5.2e-05	4.3e-05	0.000156	0.000103	5e-05	0.000677					0.054406	0.001589	0.000406		0.001598			0.00177	0.008709	Energy Disper-sive X-Ray Fluorescence (ED-XRF) spectrometry (Epsilon 13 ED-XRF, PANalytical B. V., the Netherlands)	Ion chromatography (IC, Dionex 508, Dionex Corp, Sunnyvale, California, United States)
FD	RD	Changchun		PM2.5	-	direct sampling	0.007924	0.000584	4e-06		0.043065	0.001197	0.074571	0.014301		0.047301	0.003126	8.7e-05	7.8e-05	0.000892	0.032415	3.3e-05	9.4e-05	9.1e-05	0.000401			9.1e-05	7.9e-05	0.000249	8.8e-05	6.2e-05	0.000877					0.038596	0.001573	0.000474		0.001327			0.000773	0.005314	Energy Disper-sive X-Ray Fluorescence (ED-XRF) spectrometry (Epsilon 14 ED-XRF, PANalytical B. V., the Netherlands)	Ion chromatography (IC, Dionex 509, Dionex Corp, Sunnyvale, California, United States)
FD	RD	Sheyang		PM2.5	-	direct sampling	0.008842	0.001094	1.1e-05		0.022594	0.004108	0.054553	0.009636		0.069616	0.002168	3.9e-05	7.4e-05	0.00058	0.024641	2.8e-05	0.000122	0.00013	0.000435			6.5e-05	5e-05	0.000279	7e-05	4.4e-05	0.00076					0.01997	0.001356	0.00056		0.002451			0.001577	0.020573	Energy Disper-sive X-Ray Fluorescence (ED-XRF) spectrometry (Epsilon 15 ED-XRF, PANalytical B. V., the Netherlands)	Ion chromatography (IC, Dionex 510, Dionex Corp, Sunnyvale, California, United States)
FD	CD	Xi'an		PM2.5	-	direct sampling	0.021015	0.00257	2.6e-05		0.092499	0.004355	0.1248	0.038692		0.166126	0.006835	0.000183	0.000265	0.002024	0.077541	7.8e-05	0.000211	0.000526	0.001529			0.000203	0.000225	0.00067	0.000332	0.00018	0.002285					0.071615	0.002973	0.004136		0.008068			0.003345	0.011429	Energy Disper-sive X-Ray Fluorescence (ED-XRF) spectrometry (Epsilon 16 ED-XRF, PANalytical B. V., the Netherlands)	Ion chromatography (IC, Dionex 511, Dionex Corp, Sunnyvale, California, United States)
FD	CD	Yinchuan		PM2.5	-	direct sampling	0.026732	0.003429	2.3e-05		0.029834	0.007324	0.043735	0.018874		0.086443	0.002805	8.4e-05	0.000108	0.000894	0.03184	3.9e-05	0.00019	0.000218	0.000343			7.8e-05	7.6e-05	0.000421	0.000166	7.5e-05	0.000895					0.071417	0.003395	0.00513		0.012821			0.006642	0.03819	Energy Disper-sive X-Ray Fluorescence (ED-XRF) spectrometry (Epsilon 17 ED-XRF, PANalytical B. V., the Netherlands)	Ion chromatography (IC, Dionex 512, Dionex Corp, Sunnyvale, California, United States)
FD	CD	Lanzhou		PM2.5	-	direct sampling	0.018559	0.002125	6e-06		0.016758	0.00454	0.037064	0.014583		0.097767	0.002262	5e-05	8.5e-05	0.000647	0.02759	2.7e-05	0.000112	0.000165	0.000413			7e-05	6.9e-05	0.000314	7.5e-05	5.7e-05	0.000727					0.077363	0.003712	0.004178		0.009126			0.003214	0.018609	Energy Disper-sive X-Ray Fluorescence (ED-XRF) spectrometry (Epsilon 18 ED-XRF, PANalytical B. V., the Netherlands)	Ion chromatography (IC, Dionex 513, Dionex Corp, Sunnyvale, California, United States)
FD	CD	Beijing		PM2.5	-	direct sampling	0.0114	0.001125	5e-06		0.031424	0.003015	0.038675	0.011998		0.115719	0.002516	7.1e-05	7.6e-05	0.000922	0.031562	2.9e-05	8e-05	0.000116	0.000272			8e-05	5.2e-05	0.000425	7.3e-05	6.1e-05	0.000702					0.079602	0.002319	0.002335		0.002854			0.003775	0.013134	Energy Disper-sive X-Ray Fluorescence (ED-XRF) spectrometry (Epsilon 19 ED-XRF, PANalytical B. V., the Netherlands)	Ion chromatography (IC, Dionex 514, Dionex Corp, Sunnyvale, California, United States)
FD	CD	Tianjin		PM2.5	-	direct sampling	0.012537	0.001939	1.1e-05		0.028792	0.003406	0.079848	0.012232		0.078842	0.002508	7.1e-05	8.8e-05	0.000796	0.028002	2.6e-05	0.000108	0.000135	0.00057			6.2e-05	5.8e-05	0.000285	0.0001	7.7e-05	0.000827					0.054818	0.00167	0.001642		0.004963			0.003856	0.014408	Energy Disper-sive X-Ray Fluorescence (ED-XRF) spectrometry (Epsilon 20 ED-XRF, PANalytical B. V., the Netherlands)	Ion chromatography (IC, Dionex 515, Dionex Corp, Sunnyvale, California, United States)
FD	CD	Baoding		PM2.5	-	direct sampling	0.008786	0.001024	2.1e-05		0.039692	0.00392	0.042219	0.014109		0.099208	0.002968	7.9e-05	8.2e-05	0.00088	0.031446	2.9e-05	7.4e-05	0.000121	0.000441			7e-05	7.3e-05	0.000276	7.2e-05	5.3e-05	0.00076					0.061845	0.001422	0.001896		0.00196			0.002974	0.013365	Energy Disper-sive X-Ray Fluorescence (ED-XRF) spectrometry (Epsilon 21 ED-XRF, PANalytical B. V., the Netherlands)	Ion chromatography (IC, Dionex 516, Dionex Corp, Sunnyvale, California, United States)
FD	CD	Shijiazhuang		PM2.5	-	direct sampling	0.008441	0.00039	1.4e-05		0.034715	0.002603	0.047154	0.011307		0.087889	0.002813	7.8e-05	9e-05	0.000758	0.025338	2.4e-05	5.8e-05	8.4e-05	0.00022			6.9e-05	5.8e-05	0.00033	5.3e-05	4.1e-05	0.00058					0.036998	0.00123	0.000443		0.002291			0.001804	0.011446	Energy Disper-sive X-Ray Fluorescence (ED-XRF) spectrometry (Epsilon 22 ED-XRF, PANalytical B. V., the Netherlands)	Ion chromatography (IC, Dionex 517, Dionex Corp, Sunnyvale, California, United States)
FD	CD	Handan		PM2.5	-	direct sampling	0.008966	0.000771	1.2e-05		0.033634	0.003149	0.057294	0.012254		0.099587	0.002598	9.9e-05	9.6e-05	0.000922	0.028049	2.1e-05	0.000133	0.000107	0.000222			7.1e-05	6.8e-05	0.000275	7.9e-05	4.6e-05	0.000689					0.059084	0.001398	0.000812		0.002185			0.002506	0.012523	Energy Disper-sive X-Ray Fluorescence (ED-XRF) spectrometry (Epsilon 23 ED-XRF, PANalytical B. V., the Netherlands)	Ion chromatography (IC, Dionex 518, Dionex Corp, Sunnyvale, California, United States)
FD	CD	Harbin		PM2.5	-	direct sampling	0.010458	0.00057	3e-06		0.032556	0.001757	0.081803	0.01395		0.073123	0.002616	5.4e-05	6.6e-05	0.00092	0.027855	2.5e-05	7.2e-05	8.7e-05	0.000299			7.5e-05	6.7e-05	0.000263	9.9e-05	5.1e-05	0.000707					0.064663	0.002378	0.000375		0.0014			0.001299	0.008148	Energy Disper-sive X-Ray Fluorescence (ED-XRF) spectrometry (Epsilon 24 ED-XRF, PANalytical B. V., the Netherlands)	Ion chromatography (IC, Dionex 519, Dionex Corp, Sunnyvale, California, United States)
FD	CD	Changchun		PM2.5	-	direct sampling	0.011081	0.000541	9e-06		0.049783	0.002304	0.120737	0.016167		0.094495	0.00314	8.1e-05	9.3e-05	0.001385	0.035531	2.9e-05	9.6e-05	8.7e-05	0.00058			9.5e-05	7.9e-05	0.000347	0.000109	9.7e-05	0.000748					0.069283	0.001825	0.000507		0.001406			0.001348	0.00835	Energy Disper-sive X-Ray Fluorescence (ED-XRF) spectrometry (Epsilon 25 ED-XRF, PANalytical B. V., the Netherlands)	Ion chromatography (IC, Dionex 520, Dionex Corp, Sunnyvale, California, United States)
FD	CD	Shenyang		PM2.5	-	direct sampling	0.006424	0.000659	9e-06		0.035927	0.003305	0.048306	0.010866		0.105336	0.002497	5.7e-05	7.6e-05	0.00072	0.027285	2.5e-05	0.000175	8.9e-05	0.000257			7e-05	6.2e-05	0.000404	4.7e-05	3.1e-05	0.000658					0.013027	0.003581	0.003079		0.001819			0.001192	0.012741	Energy Disper-sive X-Ray Fluorescence (ED-XRF) spectrometry (Epsilon 26 ED-XRF, PANalytical B. V., the Netherlands)	Ion chromatography (IC, Dionex 521, Dionex Corp, Sunnyvale, California, United States)
FD	SD	Urumqi	2002	PM10	-	resuspended sampling	0.0031		0	0.015	0.0618		0.2535	0.0221	0.0011	0.0491	0.0045	0.0001	0.0001	0.0011	0.0359	0	0.0001	0	0.0002			0					0.0007	0.0238		0.0405						0.0006	0.0002		0.0003	0.0063	Inductively coupled plasma (ICP) analysis	Ion chromatography (DX-100, Dionex Ltd., USA)	Elementar Analysensysteme GmbH VarioE1,Germany
FD	SD	Yinchuan	2002	PM10	-	resuspended sampling	0.008908		3e-06	0.020448	0.05697		0.244332	0.019523	0.000958	0.096067	0.00357	0.000105	9.8e-05	0.000614	0.03086	3.7e-05	0	0.000104	6.3e-05			2e-05					0.000423	0.011819		0.02013						0.000941	0		0	0.011352	Inductively coupled plasma (ICP) analysis	Ion chromatography (DX-101, Dionex Ltd., USA)	Elementar Analysensysteme GmbH VarioE2,Germany
FD	SD	Taiyuan	2001	PM10	-	resuspended sampling	0.00709		1.4e-05	0.016429	0.089707		0.260957	0.016828	0.001022	0.091186	0.004206	9e-05	0.000101	0.000719	0.040746	5e-05	9.6e-05	9.6e-05	0.00022			1.7e-05					0.000562	0.039475		0.060576						0.000508	0.000278		0	0.005676	Inductively coupled plasma (ICP) analysis	Ion chromatography (DX-102, Dionex Ltd., USA)	Elementar Analysensysteme GmbH VarioE3,Germany
FD	SD	Anyang	2001	PM10	-	resuspended sampling	0.002807		0.00058	0.01723	0.074038		0.262383	0.024327	0.000978	0.0535	0.00491	0.00011	0.000103	0.000756	0.04312	6.2e-05	6e-05	8.6e-05	0.00021			1.6e-05					7e-06	0.022648		0.035782						0.000159	0.0001		0.000618	0.001253	Inductively coupled plasma (ICP) analysis	Ion chromatography (DX-103, Dionex Ltd., USA)	Elementar Analysensysteme GmbH VarioE4,Germany
FD	SD	Tianjin	2001	PM10	-	resuspended sampling	0.0185		0	0.0205	0.101		0.2259	0.0368	0.0011	0.0854	0.0076	0	0.0001	0.0006	0.0296	0.0001	0	0.0001	0			0					0.0013	0.0313		0.0492						0.0001	0.0001		0	0.0075	Inductively coupled plasma (ICP) analysis	Ion chromatography (DX-104, Dionex Ltd., USA)	Elementar Analysensysteme GmbH VarioE5,Germany
FD	SD	Jinan	2000	PM10	-	resuspended sampling	0.019627			0.018806	0.067117		0.264421	0.019781		0.043127	0.006114	0.000149	0.000624	0.001339	0.046502		0.000175	8.7e-05	0.000548			0.000319						0.010829		0.022286						0.001295			0.00044	0.002975	Inductively coupled plasma (ICP) analysis	Ion chromatography (DX-105, Dionex Ltd., USA)	Elementar Analysensysteme GmbH VarioE6,Germany
[truncated: 2 more columns]

## Sheet: BB
Source	Sub-type	City	Year	Size	Fuel type	Sampling method	Na	Mg	Al	Si	K	Ca	Ti	V	Cr	Mn	Fe	Ni	Cu	Pb	Zn	As	Cd	OC	EC	Na+	Ca2+	K+	Mg2+	F-	Cl-	NH4+	NO2-	Source	Sub-type	City	Year	Size	Fuel type	Sampling method	Na	Mg	Al	Si	K	Ca	Ti	V	Cr
BB	crops	Xiamen	2016	TSP	Corn stalks	open burning-direct plume sampling		0.004			0.95	0.024																						BB	crops	Xiamen	2016	TSP	Corn stalks	open burning-direct plume sampling		0.004			0.95	0.024
BB	crops	Xiamen	2016	TSP	Rice straw	open burning-direct plume sampling		0.01			0.9	0.046																						BB	crops	Xiamen	2016	TSP	Rice straw	open burning-direct plume sampling		0.01			0.9	0.046
BB	crops	Pingdingshan	2016	TSP	Wheat straw	open burning-direct plume sampling		0.012			0.81	0.098																						BB	crops	Pingdingshan	2016	TSP	Wheat straw	open burning-direct plume sampling		0.012			0.81	0.098
BB	crops	Henan	2017	PM2.5	Wheat(Flame)	open burning-direct plume sampling																		0.0004099	1.68e-05	1.3e-06		0.0003269			0.023325	0.0008127		BB	crops	Henan	2017	PM2.5	Wheat(Flame)	open burning-direct plume sampling
BB	crops	Hubei	2017	PM2.5	Rice(Flame)	open burning-direct plume sampling																		0.000561	3.33e-05	5.6e-06		0.0001599			0.006403	0.0002281		BB	crops	Hubei	2017	PM2.5	Rice(Flame)	open burning-direct plume sampling
BB	crops	Hubei	2017	PM2.5	Rice(Smolder)	open burning-direct plume sampling																		0.0005855	1.74e-05	9e-07		4.66e-05			0.000959	1.29e-05		BB	crops	Hubei	2017	PM2.5	Rice(Smolder)	open burning-direct plume sampling
BB	crops	Xiamen	2017	PM2.5	Weeds(Flame)	open burning-direct plume sampling																		0.0004517	4.47e-05	4e-06		0.0001848			0.0098	0.0004648		BB	crops	Xiamen	2017	PM2.5	Weeds(Flame)	open burning-direct plume sampling
BB	crops	Xiamen	2017	PM2.5	Weeds(Smolder)	open burning-direct plume sampling																		0.0005061	1.68e-05	1e-07		3.07e-05			0.001414	4.93e-05		BB	crops	Xiamen	2017	PM2.5	Weeds(Smolder)	open burning-direct plume sampling
BB	crops	Henan	2017	PM2.5	Corn(Flame)	open burning-direct plume sampling																		0.0003801	2.39e-05	5.3e-06		0.0006378			0.039471	0.001488		BB	crops	Henan	2017	PM2.5	Corn(Flame)	open burning-direct plume sampling
BB	crops	Henan	2017	PM2.5	Corn(Smolder)	open burning-direct plume sampling																		0.0004374	3.17e-05	2.5e-06		8.95e-05			0.011867	0.0006182		BB	crops	Henan	2017	PM2.5	Corn(Smolder)	open burning-direct plume sampling
BB	crops	Hubei	2017	PM2.5	Cotton(Flame)	open burning-direct plume sampling																		0.0003801	2.39e-05	4.08e-05		0.001502			0.020952	0.0006983		BB	crops	Hubei	2017	PM2.5	Cotton(Flame)	open burning-direct plume sampling
BB	crops	Hubei	2017	PM2.5	Cotton(Smolder)	open burning-direct plume sampling																		0.0004374	3.17e-05	1.8e-06		0.0001336			0.000523	6.4e-06		BB	crops	Hubei	2017	PM2.5	Cotton(Smolder)	open burning-direct plume sampling
BB	firewood	Xiamen	2017	PM2.5	Masson pine branch(Flame)	open burning-direct plume sampling																		0.0004312	0.0001273	8.32e-05	5.33e-05	0.0004447			0.007613	0.0003967		BB	firewood	Xiamen	2017	PM2.5	Masson pine branch(Flame)	open burning-direct plume sampling
BB	firewood	Xiamen	2017	PM2.5	Masson pine branch(Smolder)	open burning-direct plume sampling																		0.0005934	5.14e-05	6.31e-05	0.0001127	9.81e-05			0.002086	0.0001447		BB	firewood	Xiamen	2017	PM2.5	Masson pine branch(Smolder)	open burning-direct plume sampling
BB	firewood	Xiamen	2017	PM2.5	Masson pine leaf(Flame)	open burning-direct plume sampling																		0.0004139	0.0001991	7.36e-05	8.58e-05	0.0002601			0.012829	0.0006134		BB	firewood	Xiamen	2017	PM2.5	Masson pine leaf(Flame)	open burning-direct plume sampling
BB	firewood	Xiamen	2017	PM2.5	Masson pine leaf(Smolder)	open burning-direct plume sampling																		0.0006466	2.51e-05	4.4e-06		4.02e-05			0.001428	7.09e-05		BB	firewood	Xiamen	2017	PM2.5	Masson pine leaf(Smolder)	open burning-direct plume sampling
BB	crops	Zhejiang, Anhui, Jiangsu	2015	PM2.5	Wheat straw(Flame)	open burning-direct plume sampling																		0.431	0.105	0.005	0.003	0.024	0.005		0.034	0.006		BB	crops	Zhejiang, Anhui, Jiangsu	2015	PM2.5	Wheat straw(Flame)	open burning-direct plume sampling
BB	crops	Zhejiang, Anhui, Jiangsu	2015	PM2.5	Wheat straw(Smolder)	open burning-direct plume sampling																		0.447	0.064	0.003	0.001	0.004	0.003		0.005	0.002		BB	crops	Zhejiang, Anhui, Jiangsu	2015	PM2.5	Wheat straw(Smolder)	open burning-direct plume sampling
BB	other	Zhejiang, Anhui, Jiangsu	2015	PM2.5	Straw(Flame)	open burning-direct plume sampling																		0.4728	0.0794	0.0083	0.0017	0.01	0.0089		0.0216	0.0142		BB	other	Zhejiang, Anhui, Jiangsu	2015	PM2.5	Straw(Flame)	open burning-direct plume sampling
BB	other	Zhejiang, Anhui, Jiangsu	2015	PM2.5	Straw(Smolder)	open burning-direct plume sampling																		0.4679	0.062	0.0035	0.0006	0.0007	0.0041		0.0036	0.005		BB	other	Zhejiang, Anhui, Jiangsu	2015	PM2.5	Straw(Smolder)	open burning-direct plume sampling
BB	crops	Shannxi, Hebei	2008	TSP	Wheat straw	stove combustion-dilution tunnel																		0.3954	0.048	0.0112	0.0077	0.0956	0.0006	0.0003	0.1085	0.0012	0.0008	BB	crops	Shannxi, Hebei	2008	TSP	Wheat straw	stove combustion-dilution tunnel
BB	crops	Jiangsu, Hubei,Guangxi, Sichuan	2008	TSP	Rice straw	stove combustion-dilution tunnel																		0.3201	0.078	0.0122	0.0097	0.1139	0.001	0.0001	0.1361	0.0005	0.0009	BB	crops	Jiangsu, Hubei,Guangxi, Sichuan	2008	TSP	Rice straw	stove combustion-dilution tunnel
BB	crops	Shandong, Jilin,Henan, Mongolia	2008	TSP	Corn stover	stove combustion-dilution tunnel																		0.4237	0.1789	0.0178	0.0135	0.0339	0.0002	0.0006	0.07	0.0001	0.0013	BB	crops	Shandong, Jilin,Henan, Mongolia	2008	TSP	Corn stover	stove combustion-dilution tunnel
BB	crops	Xinjiang	2008	TSP	Cotton stalk	stove combustion-dilution tunnel																		0.404	0.181	0.0226	0.0103	0.1623		0.0001	0.1602	0.6		BB	crops	Xinjiang	2008	TSP	Cotton stalk	stove combustion-dilution tunnel
BB	crops	Jiangsu, Henan	2017	TSP	Wheat straw（Flame）	open burning-direct plume sampling																		0.431	0.105	0.005	0.003	0.024	0.005		0.034			BB	crops	Jiangsu, Henan	2017	TSP	Wheat straw（Flame）	open burning-direct plume sampling
BB	crops	Jiangsu, Henan	2017	TSP	Wheat straw(Smolder)	open burning-direct plume sampling																		0.447	0.064	0.003		0.001	0.003		0.005			BB	crops	Jiangsu, Henan	2017	TSP	Wheat straw(Smolder)	open burning-direct plume sampling
BB	crops	Zhejiang, Anhui, Jiangsu	2017	TSP	Rice straw（Flame）	open burning-direct plume sampling																		0.473	0.079	0.008	0.002	0.01	0.009		0.022	0.014		BB	crops	Zhejiang, Anhui, Jiangsu	2017	TSP	Rice straw（Flame）	open burning-direct plume sampling
BB	crops	Zhejiang, Anhui, Jiangsu	2017	TSP	Rice straw(Smolder)	open burning-direct plume sampling																		0.468	0.062	0.003	0.001	0.001	0.004		0.004	0.005		BB	crops	Zhejiang, Anhui, Jiangsu	2017	TSP	Rice straw(Smolder)	open burning-direct plume sampling
BB	firewood	Nanjing	2015	PM2.5	Dry branches（Flame）	open burning-direct plume sampling																		0.416	0.132									BB	firewood	Nanjing	2015	PM2.5	Dry branches（Flame）	open burning-direct plume sampling
BB	firewood	Nanjing	2015	PM2.5	Dry branches(Smolder)	open burning-direct plume sampling																		0.442	0.085									BB	firewood	Nanjing	2015	PM2.5	Dry branches(Smolder)	open burning-direct plume sampling
BB	firewood	Nanjing	2015	PM2.5	Fresh branches（Flame）	open burning-direct plume sampling																		0.454	0.111									BB	firewood	Nanjing	2015	PM2.5	Fresh branches（Flame）	open burning-direct plume sampling
BB	firewood	Nanjing	2015	PM2.5	Fresh branches(Smolder)	open burning-direct plume sampling																		0.465	0.075									BB	firewood	Nanjing	2015	PM2.5	Fresh branches(Smolder)	open burning-direct plume sampling
BB	crops	Wuhan	2018	PM2.5	Rape, wheat straw	open burning-direct plume sampling	0.0019	0.0006	0.0023	0.0025	0.0114	0.012	0.0001		0.0004	0.0001	0.0008	0	0.0005		0.0003			0.4815	0.0281						0.0087	0.0025		BB	crops	Wuhan	2018	PM2.5	Rape, wheat straw	open burning-direct plume sampling	0.0019	0.0006	0.0023	0.0025	0.0114	0.012	0.0001		0.0004
BB	crops	Wuhan	2018	PM10	Rape, wheat straw	open burning-direct plume sampling	0.0012	0.0013	0.0021	0.0045	0.0047	0.0238	0.0001		0.0006	0.0002	0.0017	0.0001	0.0007		0.0004			0.4907	0.0243						0.87	0.22		BB	crops	Wuhan	2018	PM10	Rape, wheat straw	open burning-direct plume sampling	0.0012	0.0013	0.0021	0.0045	0.0047	0.0238	0.0001		0.0006
BB	crops	Lvliang	2017	PM10	Millet pole	open burning-direct plume sampling																		0.3406	0.2895									BB	crops	Lvliang	2017	PM10	Millet pole	open burning-direct plume sampling
BB	crops	Lvliang	2017	PM10	Bean straw	open burning-direct plume sampling																		0.348	0.2765									BB	crops	Lvliang	2017	PM10	Bean straw	open burning-direct plume sampling
BB	crops	Lvliang	2017	PM10	Corn stover	open burning-direct plume sampling																		0.3331	0.2906									BB	crops	Lvliang	2017	PM10	Corn stover	open burning-direct plume sampling
BB	other	Lvliang	2017	PM10	Leaves	open burning-direct plume sampling																		0.3978	0.3368									BB	other	Lvliang	2017	PM10	Leaves	open burning-direct plume sampling
BB	other	Lvliang	2017	PM10	Grass	open burning-direct plume sampling																		0.3688	0.3132									BB	other	Lvliang	2017	PM10	Grass	open burning-direct plume sampling
BB	crops	Chongqing	2009	PM2.5	Rice straw	open burning-dilution tunnel	0.0050-0.0143	0.0029-0.0056	0.0005-0.0020		0.0404-0.0605	0.0070-0.0131					0.0003-0.0012							0.5464-0.6446				0.0478-0.0532			0.0533-0.0583	0.0044-0.0064		BB	crops	Chongqing	2009	PM2.5	Rice straw	open burning-dilution tunnel	0.0050-0.0143	0.0029-0.0056	0.0005-0.0020		0.0404-0.0605	0.0070-0.0131
BB	crops	Chongqing	2009	PM2.5	Maize residue	open burning-dilution tunnel	0.0069-0.0078	0.0033-0.0036	0.0014-0.0026		0.1056-0.1319	0.0093-0.0133					0.0004-0.0005							0.3469-0.8338				0.0967-0.1712			0.0949-0.1723	0.0075-0.0173		BB	crops	Chongqing	2009	PM2.5	Maize residue	open burning-dilution tunnel	0.0069-0.0078	0.0033-0.0036	0.0014-0.0026		0.1056-0.1319	0.0093-0.0133
BB	crops	Chongqing	2009	PM2.5	Bean straw	open burning-dilution tunnel	0.005	0.0020-0.0009	0.00065		0.076	0.00216					0.00042							0.2774				0.0661			0.0439	0.0046		BB	crops	Chongqing	2009	PM2.5	Bean straw	open burning-dilution tunnel	0.005	0.0020-0.0009	0.00065		0.076	0.00216
BB	firewood	Chongqing	2009	PM2.5	Fuel wood	open burning-dilution tunnel	0.0049-0.0102	0.0018-0.0039	0.0002-0.0007		0.0084-0.0148	0.0016-0.0035					0.0003-0.0005							0.1853-0.3122				0.0078-0.0131			0.0113-0.0179	0.0016-0.0030		BB	firewood	Chongqing	2009	PM2.5	Fuel wood	open burning-dilution tunnel	0.0049-0.0102	0.0018-0.0039	0.0002-0.0007		0.0084-0.0148	0.0016-0.0035
BB	firewood	Chongqing	2009	PM2.5	Branch	open burning-dilution tunnel	0.0043-0.0059	0.0015-0.0017	0.0003		0.0185-0.0333	0.0012					0.0001-0.0003							0.3931-0.5859				0.0134-0.0382			0.0165-0.0462	0.0049-0.0111		BB	firewood	Chongqing	2009	PM2.5	Branch	open burning-dilution tunnel	0.0043-0.0059	0.0015-0.0017	0.0003		0.0185-0.0333	0.0012
BB	firewood	Beijing	2009	PM2.5	Branch	open burning-dilution tunnel	0.00755	0.0036	0.00083		0.05108	0.01913					0.0005							0.3233				0.0469			0.0165-0.0004	0.0026		BB	firewood	Beijing	2009	PM2.5	Branch	open burning-dilution tunnel	0.00755	0.0036	0.00083		0.05108	0.01913
BB	crops	Henan	2009	PM2.5	Cotton stalk	open burning-dilution tunnel	0.00542	0.00211	0.00078		0.00737	0.00666					0.00036							0.4527				0.0089			0.0084	0.0008		BB	crops	Henan	2009	PM2.5	Cotton stalk	open burning-dilution tunnel	0.00542	0.00211	0.00078		0.00737	0.00666
BB	crops	Henan	2009	PM2.5	Wheat residue	open burning-dilution tunnel	0.0079-0.0094	0.0027-0.0024	0.0003-0.0009		0.2139-0.2147	0.0023-0.0090					0.0003-0.0010							0.3302-0.3584				0.2091-0.2284			0.1630-0.1741	0.0055-0.0076		BB	crops	Henan	2009	PM2.5	Wheat residue	open burning-dilution tunnel	0.0079-0.0094	0.0027-0.0024	0.0003-0.0009		0.2139-0.2147	0.0023-0.0090
BB	crops	Henan	2009	PM2.5	Kaoliang stalk	open burning-dilution tunnel	0.0039-0.0050	0.0023-0.0024	0.0006-0.0007		0.0146-0.0255	0.0079-0.1460					0.0003-0.0005							0.5264-0.5521				0.0134-0.0236			0.0135-0.0192	0.0015-0.0017		BB	crops	Henan	2009	PM2.5	Kaoliang stalk	open burning-dilution tunnel	0.0039-0.0050	0.0023-0.0024	0.0006-0.0007		0.0146-0.0255	0.0079-0.1460
BB	crops	Shandong	2009	PM2.5	Wheat residue	open burning-dilution tunnel	0.00284	6e-05	8e-05		0.04156	0.00036					1e-05							0.4196				0.0408			0.0811	0.0414		BB	crops	Shandong	2009	PM2.5	Wheat residue	open burning-dilution tunnel	0.00284	6e-05	8e-05		0.04156	0.00036
BB	crops	Shandong	2009	PM2.5	Maize residue	open burning-dilution tunnel	0.00263	5e-05	0.00015		0.8341	0.00017					7e-05							0.4175				0.0908			0.1702	0.0317		BB	crops	Shandong	2009	PM2.5	Maize residue	open burning-dilution tunnel	0.00263	5e-05	0.00015		0.8341	0.00017
BB	firewood	Shandong	2009	PM2.5	Fuel wood	open burning-dilution tunnel	0.00752	0.00011	0.00203		0.03058	0.00047					0.00014							0.4025				0.0358			0.0474	0.0037		BB	firewood	Shandong	2009	PM2.5	Fuel wood	open burning-dilution tunnel	0.00752	0.00011	0.00203		0.03058	0.00047
[truncated: 25 more columns]

## Sheet: CE
Source	Sub-type	City	Year	Size	Fuel type	Sampling method	Na	Mg	Al	Si	K	Ca	Ti	V	Cr	Mn	Fe	Ni	Cu	Pb	Zn	As	Cd	OC	EC	Ca2+	K+	Mg2+	F-	Cl-	NH4+	NO3-	SO42-	Elemental analysis	Ion analysis	OC/EC analysis	Reference	Note
CE	domestic cooking		2015	PM2.5		direct sampling	0.002	0.00076			0.0011	0.0019				1.4e-05	0.0011	1.3e-05	1.6e-05	2.8e-05	0.00014	6e-06		0.63	0.0042		0.00037			0.00025		0.0016	0.0018	ICP-MS,ICP-OES	Ion chromatography	thermal/optical reﬂectance (TOR)	Zhang et al, 2017	Zhang, N., Han, B., He, F., Xu, J, Zhao, R. J., Zhang, Y. J., and Bai, Z. P.: Chemical characterstic of PM2.5 emission and inhalational carcinogenic risk of domestic Chinese cooking, Environ. Pollut., 227, 24-30, 2017.
CE	home cooking	Beijing	2015	PM2.5		dilution sampling		0.003	0.005			0.013	0.002		0.003	0	0.032	0.003	0		0.001			0.407	0.013	0.007	0.019	0.018	0.001	0.01	0.019	0.001	0.023	ICP-MS	Ion chromatography	thermal optical carbon analyzer	Wang et al, 2015	Wang, G., Cheng, S. Y., Wei, w., Wen, w., Wang, X,. Q., and Yao, S.: Chemical Characteristics of Fine Particles Emitted from Different Chinese Cooking Styles, Aerosol Air Qual. Res., 15, 2357-2366, 2015.
CE	Shandong cuisine	Beijing	2015	PM2.5		dilution sampling		0.004	0.006			0.019	0.002		0.005	0.001	0.032	0.002	0.001		0.002			0.428	0.009	0.023	0.023	0.024	0.001	0.01	0.009	0.002	0.024	ICP-MS	Ion chromatography	thermal optical carbon analyzer	Wang et al, 2015	Wang, G., Cheng, S. Y., Wei, w., Wen, w., Wang, X,. Q., and Yao, S.: Chemical Characteristics of Fine Particles Emitted from Different Chinese Cooking Styles, Aerosol Air Qual. Res., 15, 2357-2366, 2015.
CE	Hunan cuisine	Beijing	2015	PM2.5		dilution sampling		0.003	0.005			0.01	0.002		0.003	0	0.025	0.002	0		0.001			0.429	0.008	0.014	0.018	0.023	0.003	0.021	0.026	0.012	0.027	ICP-MS	Ion chromatography	thermal optical carbon analyzer	Wang et al, 2015	Wang, G., Cheng, S. Y., Wei, w., Wen, w., Wang, X,. Q., and Yao, S.: Chemical Characteristics of Fine Particles Emitted from Different Chinese Cooking Styles, Aerosol Air Qual. Res., 15, 2357-2366, 2015.
CE	barbecue	Beijing	2015	PM2.5		dilution sampling		0.006	0.005			0.016	0.002		0.002	0	0.01	0.001	0		0.001			0.362	0.184	0.003	0.024	0.004	0.001	0.022	0.005	0.003	0.015	ICP-MS	Ion chromatography	thermal optical carbon analyzer	Wang et al, 2015	Wang, G., Cheng, S. Y., Wei, w., Wen, w., Wang, X,. Q., and Yao, S.: Chemical Characteristics of Fine Particles Emitted from Different Chinese Cooking Styles, Aerosol Air Qual. Res., 15, 2357-2366, 2015.
CE	street food	Jincheng	2014	PM2.5		direct sampling	0.0187	0.0283	0.0433	0.0572	0.0176	0.00597	0.0011	0.0053	0.0005	0.0002	0.0044	0.0007	0	0.0071	0.0023	0.0005	0.0002			0.0827	0.0083	0.0051	0.0008	0.0213	0.0321	0.0249	0.0644	Ion emission spectrometer analysis	Ion chromatography		Zhang et al, 2016	Zhang, T., Peng L., LI, Y. H., Wang, Y. X., and Wang, Y.: Chemical characteristics of PM2.5 emitted from cooking fumes, Research of Environmental Sciences, 29, 183-191, 2016.
CE	open air barbecue	Jincheng	2014	PM2.5		direct sampling	0.044	0.0023	0.0073	0.0082	0.005	0.0146	0.0002	0.0009	0.0001	0.0001	0.0006	0.0001	0	0.0003	0.0002	0.0001	0	0.7498		0.0075	0.0041	0.0006	0.0002	0.0051	0.0003	0.0013	0.0055	Ion emission spectrometer analysis	Ion chromatography		Zhang et al, 2016	Zhang, T., Peng L., LI, Y. H., Wang, Y. X., and Wang, Y.: Chemical characteristics of PM2.5 emitted from cooking fumes, Research of Environmental Sciences, 29, 183-191, 2016.
CE	hot pot shop	Jincheng	2014	PM2.5		direct sampling	0.0224	0.0143	0.036	0.0456	0.0232	0.0538	0.0009	0.0048	0.0012	0.0001	0.0015	0.0004	0	0.0042	0.0026	0.0004	0.0001	0.3811		0.0342	0.0169	0.0025	0.0006	0.0498	0.0223	0.0207	0.0334	Ion emission spectrometer analysis	Ion chromatography		Zhang et al, 2016	Zhang, T., Peng L., LI, Y. H., Wang, Y. X., and Wang, Y.: Chemical characteristics of PM2.5 emitted from cooking fumes, Research of Environmental Sciences, 29, 183-191, 2016.
CE	large and medium sized restaurants	Jincheng	2014	PM2.5		direct sampling	0.0111	0.0074	0.0214	0.0306	0.0065	0.0342	0.0003	0.0011	0.0002	0.0002	0.008	0.0005	0	0.0016	0.0023	0.0001	0	0.7581		0.0259	0.0019	0.0025	0.0004	0.0099	0.0025	0.0062	0.0134	Ion emission spectrometer analysis	Ion chromatography		Zhang et al, 2016	Zhang, T., Peng L., LI, Y. H., Wang, Y. X., and Wang, Y.: Chemical characteristics of PM2.5 emitted from cooking fumes, Research of Environmental Sciences, 29, 183-191, 2016.
CE	Hunan cooking	Shenzhen	2001	PM2.5		direct sampling																		0.816	0.001	0.001	0.0006	0.0002		0.003	0.0013	0.0032	0.0023		Ion chromatography	GC/MS	He et al, 2004	He, L. Y., Hu, M., Huang, X. F., Yu, B. D., Zhang, Y. H., and Liu, D. Q.: Measurement of emissions of fine particulate organic matter from Chinese cooking, Atmos. Environ., 38, 6557-6564, 2004.
CE	cantonese cooking	Shenzhen	2001	PM2.5		direct sampling																		0.526	0.016	0.001	0.0005	0.0002		0.0024	0.0034	0.0034	0.0077		Ion chromatography	GC/MS	He et al, 2004	He, L. Y., Hu, M., Huang, X. F., Yu, B. D., Zhang, Y. H., and Liu, D. Q.: Measurement of emissions of fine particulate organic matter from Chinese cooking, Atmos. Environ., 38, 6557-6564, 2004.
CE		Wuxi		PM10		direct sampling	0.045713	0.007995	0.090123		0.006848	0.008837				0.000162	0.008837		0.000356	9.8e-05	0.00107			0.482671	0.015667					0.00591	0.016815	0.027381	0.038185	ICP-OES	Ion chromatography	thermal/optical carbon analyzer	Chen et al,2017	Chen, P. L., Wang, T. J., Matthew, K., Han, Y., Xie, M., Li, S., Zhuang, B. L., Li, M. M., and Huang, T. N.: Characterization of major natural and anthropegenic source profiles for size-fractionated PM in Yangtze River Delta, Sci. Total Environ., 598, 135-145, 2017.
CE		Wuhan		PM2.5			0.0004	0.0005	0.0005	0.0035	0.0009	0.0135	0.0001	0	0.0002	0.0002	0.0021	0.0001	0.0001	0.0001	0.0008			0.4619	0.0138					0.0016	0.0025	0.0025	0.0028				Gong et al, 2018	Gong, P., and Luo, Y.: Study on the characteristics of source profiles in Wuhan, Nanjing University of information science and technology (Nat, Sci, Ed.)., 10, 579-589, 2018.
CE		Wuhan		PM10			0.0003	0.0004	0.0004	0.0025	0.0007	0.0179	0.0001	0	0.0002	0.0002	0.0016	0.0001	0.0001	0.0001	0.001			0.5085	0.0141					0.0028	0.0088	0.0055	0.0122				Gong et al, 2018	Gong, P., and Luo, Y.: Study on the characteristics of source profiles in Wuhan, Nanjing University of information science and technology (Nat, Sci, Ed.)., 10, 579-589, 2018.
CE		Wuxi		PM10		direct sampling	0.045713	0.007995	0.090123		0.006848	0.008837				0.000162	0.008837		0.000356	9.8e-05	0.00107			0.482671	0.015667					0.00591	0.016815	0.027381	0.038185	ICP-OES	Ion chromatography	thermal/optical carbon analyzer	Chen et al,2017	Chen, P. L., Xie, X. D., Wang, T. J., Du, Y. X., Dong, M., and Zou, H.: A study of chemical mass balance source apportionment of size-fractionated particulate matter in Wuxi, Chinese Meteorological Society. 34th Annual Meeting of the Chinese Meteorological Society S9 Proceedings of Atmospheric Composition and Weather, Climate Change and Environmental Impacts., 21, 2017.
CE	outdoor barbecue	Ya' an		PM2.5		direct sampling																					0.006				0.005		0.023	X-ray fluorescence spectrometer	Ion chromatography	thermal optical carbon analyzer	Shu et al, 2014	Shu, M., Li, Y. C., and Cao, J. J.: Characteristics of PM2.5 Emitted from Cooking Emissions: a Review, Chinese Society of Environmental Sciences. 2014 China Society of Environmental Sciences Academic Annual Meeting (Chapter 6)., 2014.
CE	outdoor grilled fish	Chengdu		PM2.5		direct sampling																					0.0025			0.047	0.012	0.007	0.051	X-ray fluorescence spectrometer	Ion chromatography	thermal optical carbon analyzer	Shu et al, 2014	Shu, M., Li, Y. C., and Cao, J. J.: Characteristics of PM2.5 Emitted from Cooking Emissions: a Review, Chinese Society of Environmental Sciences. 2014 China Society of Environmental Sciences Academic Annual Meeting (Chapter 6)., 2014.
CE	Xinkang street	Chengdu		PM2.5		direct sampling																									0.034	0.015	0.106	X-ray fluorescence spectrometer	Ion chromatography	thermal optical carbon analyzer	Shu et al, 2014	Shu, M., Li, Y. C., and Cao, J. J.: Characteristics of PM2.5 Emitted from Cooking Emissions: a Review, Chinese Society of Environmental Sciences. 2014 China Society of Environmental Sciences Academic Annual Meeting (Chapter 6)., 2014.
CE	indoor snack street	Chengdu		PM2.5		direct sampling																								0.202	0.105	0.009	0.094	X-ray fluorescence spectrometer	Ion chromatography	thermal optical carbon analyzer	Shu et al, 2014	Shu, M., Li, Y. C., and Cao, J. J.: Characteristics of PM2.5 Emitted from Cooking Emissions: a Review, Chinese Society of Environmental Sciences. 2014 China Society of Environmental Sciences Academic Annual Meeting (Chapter 6)., 2014.
CE	restaurant stir fry	Chengdu		PM2.5		direct sampling																									0.001	0.002	0.011	X-ray fluorescence spectrometer	Ion chromatography	thermal optical carbon analyzer	Shu et al, 2014	Shu, M., Li, Y. C., and Cao, J. J.: Characteristics of PM2.5 Emitted from Cooking Emissions: a Review, Chinese Society of Environmental Sciences. 2014 China Society of Environmental Sciences Academic Annual Meeting (Chapter 6)., 2014.
CE	restaurant cooking	Chengdu		PM2.5		direct sampling																									0.031	0.022	0.088	X-ray fluorescence spectrometer	Ion chromatography	thermal optical carbon analyzer	Shu et al, 2014	Shu, M., Li, Y. C., and Cao, J. J.: Characteristics of PM2.5 Emitted from Cooking Emissions: a Review, Chinese Society of Environmental Sciences. 2014 China Society of Environmental Sciences Academic Annual Meeting (Chapter 6)., 2014.
CE	ten teaching roof	Chengdu		PM2.5		direct sampling																									0.027	0.035	0.084	X-ray fluorescence spectrometer	Ion chromatography	thermal optical carbon analyzer	Shu et al, 2014	Shu, M., Li, Y. C., and Cao, J. J.: Characteristics of PM2.5 Emitted from Cooking Emissions: a Review, Chinese Society of Environmental Sciences. 2014 China Society of Environmental Sciences Academic Annual Meeting (Chapter 6)., 2014.
CE		Beijing		PM2.5		direct sampling																				0.007	0.0019	0.0018		0.01	0.019	0.001	0.023		Ion chromatography		Li et al, 2018	Li, Q. Q., Wu, A. H., Gong, D. C., Wang, B, G., and Luan, S. J.: Characteristics of PM2.5 emitted from cooking emissions: a review, Environ. Sci. Technol., 41, 41-50, 2018.
CE		Beijing		PM2.5		direct sampling																				0.023	0.0023	0.0024		0.01	0.009	0.002	0.024		Ion chromatography		Li et al, 2018	Li, Q. Q., Wu, A. H., Gong, D. C., Wang, B, G., and Luan, S. J.: Characteristics of PM2.5 emitted from cooking emissions: a review, Environ. Sci. Technol., 41, 41-50, 2018.
CE		Beijing		PM2.5		direct sampling																				0.014	0.0018	0.0023		0.021	0.026	0.021	0.027		Ion chromatography		Li et al, 2018	Li, Q. Q., Wu, A. H., Gong, D. C., Wang, B, G., and Luan, S. J.: Characteristics of PM2.5 emitted from cooking emissions: a review, Environ. Sci. Technol., 41, 41-50, 2018.
CE		Beijing		PM2.5		direct sampling																				0.003	0.0024	0.004		0.022	0.005	0.022	0.015		Ion chromatography		Li et al, 2018	Li, Q. Q., Wu, A. H., Gong, D. C., Wang, B, G., and Luan, S. J.: Characteristics of PM2.5 emitted from cooking emissions: a review, Environ. Sci. Technol., 41, 41-50, 2018.

## Sheet: References
No.	References
1	Bi, X. H., Feng, Y. C., Wu, J.H., Wang, Y.Q., Zhu, T.: Source apportionment of PM10 in six cities of northern China, Atmos. Environ., 41, 903-933, 2007.
2	Cao, G. L., Zhang, X. Y., Gong, S. L., Zheng, F. C.: Investigation on emission factors of particulate matter and gaseous pollutants from crop residue burning, J. Environ. Sci., 20, 50-55, 2008.
3	Chen, P. L., Wang, T. J., Hu, X., Xie, M., Zhuang, B. L., Li, S.: A study of chemical mass balance source apportionment of fine particulate matter in Nanjing, Journal of Nanjing University(Natural Science), 51, 524-534, 2015.
4	Chen, P. L., Wang, T. J., Dong, M., Matthew, K., Han, Y., Xie, M., Li, S., Zhuang, B. L., Li, M. M., and Huang, T. N.: Characterization of major natural and anthropegenic source profiles for size-fractionated PM in Yangtze River Delta, Sci. Total Environ., 598, 135-145, 2017.
5	Chen, P. L., Xie, X. D., Wang, T. J., Du, Y. X., Dong, M., and Zou, H.: A study of chemical mass balance source apportionment of size-fractionated particulate matter in Wuxi, Chinese Meteorological Society. 34th Annual Meeting of the Chinese Meteorological Society S9 Proceedings of Atmospheric Composition and Weather, Climate Change and Environmental Impacts., 21, 2017.
6	Chiang, H. L., and Huang, Y. S.: Particulate matter emissions from on-road vehicles in a freeway tunnel study, Atmos. Environ., 43, 4014-4022, 2009.
7	Dai, Q. L., Bi, X. H., Song, W. B, Li, T. K., Liu, B. S., Ding, J., Xu, J., Song, C. B., Yang, N. W., Schulze, B. C., Zhang, Y. F., Feng, Y. C., Hopke, P.K.: Residential coal combustion as a source of primary sulfate in Xi'an, China, Atmos. Environ.,196, 66-76, 2019.
8	Dai, S. G., Zhu, T., Zeng, Y. S., Fu, X. Q., Liao, Y. M.: Composition characteristics of industrial and residential coal smoke in Tianjin, Environmental Science, 8, 18-23, 1987.
9	Dong, H. L.: Source Apportionment of Atmospheric Inhalable Particulate Matter and Polycyclic Aromatic Hydrocarbons in Handan City, Tianjin University PhD thesis., 2008.
10	Ge, S., Xu, X., and Chow, J, C.: Emissions of Air Pollutants from Household Stoves: Honeycomb Coal versus Coal Cake, Environ. Sci. Technol., 38, 4612-4618, 2004.
11	Gong, P., Luo, Y.: Study on the characteristics of source spectrum of Wuhan city, Journal of Nanjing University of Information Science & Technology(Natural Science Edition)., 10, 579-589, 2018.
12	Guo, Y. Y., Gao, X., Zhu, T. Y., Luo, L., Zheng, Y.: Chemical profiles of PM emitted from the iron and steel industry in northern China, Atmos. Environ., 150, 187-197, 2016.
13	Han, B., Feng, Y., C., Bi, X. H., Xue, Y. H., Wu, J. H., Zhu, T., Ding, J. Q., and Du, Y. X.: Source apportionment of ambient PM10 in urban area of Wuxi city, Reaearch of Environmental Sciences., 22, 35-39, 2009.
14	Han, J. B., Han, B., Li, P. H., Kong, S. F., Bai, Z. P., Han, D. H., Dou, X. Y., and Zhao, X. D.: Chemical Characteriations of PM10 Profiles for Major Emission Sources in Xining, Nortewestern China, Aerosol Air Qual. Res., 14, 1017-1027, 2014.
15	Hao, M. T., Wei, L. Y., Li, Y., and Gao, J.: Comparative Study on Particulate Matters Chemical Source Profile of Vehicle Exhaust, Environmental monitoring management and technology., 24, 23-26, 2012.
16	He, L. Y., Hu, M., Huang, X. F., Yu, B. D., Zhang, Y. H., and Liu, D. Q.: Measurement of emissions of fine particulate organic matter from Chinese cooking, Atmos. Environ., 38, 6557-6564, 2004.
17	Hong, L., Liu, G., Zhou, L. M., Li, J. H., Xu, H., Wu, D.: Emission of organic carbon, elemental carbon and water-soluble ions from crop straw burning under flaming and smoldering conditions, Particuology, 31, 181-190, 2017.
18	Hong, L.: Composition of organic carbon/elemental carbon, water-soluble Ions and organic matter from crop straw combustion, Nanjing University of Information Science & Technology., 2015.
19	Hou, J.: Study on improved source apportionment of PM10 in urban atmosphere, Master's thesis of Jilin University., 2012.
20	Hua, L., Guo, J., Xu, Z. Y., Hu, Y. Q., Huang, Y., Zou, B. D.: Analysis of PM10 Source Profiles in Beijing, Environmental Monitoring in China, 22, 64-71, 2006.
21	Huang, K., Liu, G., Zhou, L. M., Li, J. H., Xu, H., Wu, D., Hong, L., Chen, H. Y., Yang, W. Z.: Organic Carbon and Elemental Carbon in Forest Biomass Burning Smoke, Environmental Science, 36, 1998-2004, 2015.
22	Jia, J., Cheng, S. Y., Yao, S., Xu, T. B., Zhang, T. T., Ma, Y. T., Wang, H. L., Duan, W. J.: Emission characteristics and chemical components of size-segregatedparticulate matter in iron and steel industry, Atmos. Environ., 182, 115-127, 2018.
23	Jin, T. S., Lu, K. B., Liu, S. X., Zhao, S., Qu, L., and Xu, X. H.: Chemical Characteristics of Particulate Matter Emission from a Heavy-Duty Diesel Engine Using ETC Cycle Dynamometer Test, Aerosol Air Qual. Res., 17, 406–411, 2017.
24	Jiong, S., John, A., D., Andrew, P. M., Li, Z. Y., and Nu, Y.: Determining the sources of atmospheric particles in Shanghai, China, from magnetic and geochemical properties, Atmos. Environ., 35, 2615-2625, 2001.
25	Kong, S. F., and Bai, Z. P.: Progress on the composition profiles for particulate matter from vehicle emission in source apportionment, Environ. Sci. Technol., 36, 26-33, 2013.
26	Li, Q. Q., Wu, A. H., Gong, D. C., Wang, B, G., and Luan, S. J.: Characteristics of PM2.5 emitted from cooking emissions: a review, Environ. Sci. Technol., 41, 41-50, 2018.
27	Li, W., Chen, C. D., Gong, M. Y., Cheng, Z. C.: CMB Receptor Model Analysis on Source of Particulate Material in Rizhao, Environmental Science and Management., 32, 45-49, 2007.
28	Li, X. G., Wang, S. X., Duan, L., Hao, J. M., Nie, Y. F.: Carbonaceous aerosol emissions from household bioful combustion in China, Environ. Sci. Technol, 43, 6076-6081, 2009.
29	Liu, H. B., Kong, S. F., Wang, W., Yan, Q.: Emission Inventory of Heavy Metals in Fine Particles Emitted from Residential Coal Burning in China, Environmental Science, 37, 2823-2835, 2016.
30	Liu, H. L., Peng, L., Zhang, T., Wang, Y., Wang, Y. X.: Distribution of carbon components and water-soluble inorganic ions in biomass burning dust, CJEE, 11, 1672-1676, 2017.
31	Liu, Y. Y., Zhang, W. J., Bai, Z. P., et al.: Characteristics of PM2. 5chemical source profiles of coal combustion and industrial process in China, Research of Environmental Sciences, 30, 1859-1868, 2017．
32	Luo, Y, H.: Study on the geochemical characteristics and source apportment of atmospheric particles in Shaoguan ciry, Zhongnan University PhD thesis. 2006.
33	Luo, Y. H.: Study on the Source Profiles of Atmospheric Particulate Matters Based on the CMB Receptor Model, SICHUAN ENVIRONMENT., 36, 17-23, 2017.
34	Peng, X. L., He, Z. J.: Source apportionment of particulate matter PM10 in Luojia industrial Area of Nanchang City, Jiangxikexue, 26, 808-811, 2008.
35	Rui, D. M., Chen, J. J., and Feng, Y, C.: Study on source apporionment of ambient air PM10 in Nanjing, Environmental science and management, 33, 56-61, 2008.
36	Shan, M., Wang, X., and Qi, H.: Study of source apportionment for air Particulate Matter( PM10) in Tai' an city, Journal of Taishan university., 26, 91-96, 2004.
37	Shen, Z. X., Sun, J., Cao, J. J., Zhang, L. M., Zhang, Q., Lei, Y. L., Gao, J. J., Huang, R. J., Liu, S. X., Huang, Y., Zhu, C. S., Xu, H. M., Zheng, C. L., Liu, P. P., Xue, Z. G.: Chemical profiles of urban fugitive dust PM 2.5 samples in Northern Chinese cities, Sci. Total Environ., 569-570 ,619-626, 2016.
38	Shi, A. J., Ma, J. W., Geng, C. M., Meng, T., and Kong, S. F.: Characteristics of Chemical Composition of Particulate Matter ( PM10) from Beijing Vehicle, China Environmental Monitoring, 30, 44-49, 2014.
39	Shu, M., Li, Y. C., and Cao, J. J.: Characteristics of PM2.5 Emitted from Cooking Emissions: a Review, Chinese Society of Environmental Sciences. 2014 China Society of Environmental Sciences Academic Annual Meeting (Chapter 6)., 2014.
40	Teng, J. Q., Wang, W., Jiang, S. J., Cheng, Z., and Xue, Y. G.: Study on the Source Profiles of PM2.5 Major Emissions in Changzhou, Environ. Sci. Technol., 28, 56-60, 2015.
41	Wang, G., Cheng, S. Y., Wei, w., Wen, w., Wang, X,. Q., and Yao, S.: Chemical Characteristics of Fine Particles Emitted from Different Chinese Cooking Styles, Aerosol Air Qual. Res., 15, 2357-2366, 2015.
42	Wang, G., Lang, J. L., Cheng, S. Y., Yao, S, and Wang, X. Q.: Characteristics of PM2.5 and hydrocarbon emitted from heavy-duty diesel vehicle, China Environmental Science, 35, 3581-3587, 2015.
43	Wang, S. L., Chai, F. H., Zhou, L. D., Wang, Q. L.: Source Apportionment of Inhalable Particulate Matter in Chengdu, Scientia Geographica Sinica, 26, 717-721, 2006.
44	Wang, Z. Z., Tan, J. H., Bi, X. H., Duan, J. C., Sheng, G. Y., Fu, J.M.: Emission characteristics and chemical species from agricultural straw burning smoke, Environ. Sci. Technol., 39, 150-155, 2016.
45	Wang, Z., Guo, J, and Chen, Z.: Analysis of the source componential spectrum of PM2.5 emission in Guiyang, Journal of Safety and Environment, 16, 346-351, 2016.
46	Wei, X., BI, X. H., Dong, H. Y., Chen, K., Sun, R., and Feng, Y. C.: Characteristics and sources of particulate matter during hazy and non-hazy episodes in Tianjin City in summer, Research of Environmental Sciences., 25, 1193-1200, 2012.
47	Wen, X. X.: Study on the pollution characteristics of airborne fine particulate matter (PM 10 and PM 2.5) in Jinan, Shandong University Master's Thesis., 2009.
48	Wu, L., Feng, Y. C., Wu, J. H., Zhu, T., Bi, X. H., Han, Bo., Yang, W. H., and Yang, Z. Q.: Secondary organic carbon quantification and source apportionment of PM10 in Kaifeng, China, Environmental Sciences, 21, 1353-1362, 2009.
49	Xia, Y. J., Huang, X. M., Song, W. B.,Yang, N. W., Yang, Y. L.: Components of PM2.5 and PM10 incoal fired boiler particulate matter of Xi'an an city, Huanjingwuranyufangzhi, 39, 207-211, 2017.
50	Zhang, J. Q., Mou, L., Bai, H. L., Wang, Y., Liu, X. F., and Song, C. F.: Study on source apportionment of PM10 in air environment of Changzhi, Shanxi. Journal of Shanxi University (Nat, Sci, Ed.)., 35, 737-742, 2012.
51	Zhang, N., Han, B., He, F., Xu, J, Zhao, R. J., Zhang, Y. J., and Bai, Z. P.: Chemical characterstic of PM2.5 emission and inhalational carcinogenic risk of domestic Chinese cooking, Environ. Pollut., 227, 24-30, 2017.
52	Zhang, T., Peng L., LI, Y. H., Wang, Y. X., and Wang, Y.: Chemical characteristics of PM2.5 emitted from cooking fumes, Research of Environmental Sciences, 29, 183-191, 2016.
53	Zhang, Y. Z., Yao, Z. L., Shen, X. B., Liu, H., He, K.: Chemical characterization of PM2.5 emitted from heavy-diesel trucks in China, Atmos. Environ., 122, 885-891, 2015.
54	Zhu, H., Dai, L. H., Wei, Y., Zhang, Y. J., Hu, Q. H., Wu, S. P.: Characteristics of inorganic ions and organic components in PM2.5 from biomass burning, Acta Sci Circum, 37, 4483-4491, 2017.
