# Supplementary material for: Characteristics of the main primary source profiles of particulate matter across China from 1987 to 2017
Source: Copernicus journal article supplement (doi:10.5194/acp-19-3223-2019), 2019-03-12
Supplement: Supplementary file 1 [file Supplementary materials.pdf › Supplementary materials.pdf]

1 *Supplementary materials to*  
2 **Characteristics of the main primary source profiles of**  
3 **particulate matter across China: from 1987 to 2017**

4 Xiaohui Bi, Qili Dai, Jianhui Wu, Qing Zhang, Wenhui Zhang, Ruixue Luo, Yuan Cheng,  
5 Jiaying Zhang, Lu Wang, Zhuojun Yu, Yufen Zhang, Yingze Tian, Yinchang Feng\*

6 State Environmental Protection Key Laboratory of Urban Ambient Air Particulate Matter  
7 Pollution Prevention and Control, College of Environment Science and Engineering, Nankai  
8 University, Tianjin, 300350, China

9

10

11 Correspondence to: Yinchang Feng ([fengyc@nankai.edu.cn](mailto:fengyc@nankai.edu.cn))

12

13

14

15

16

17

18

19

20

21

22

23

24

25

26

27

28

29 This Supplementary materials includes 1 table and 1 figure.

30

31

32

33

34

35

36

37

**Table S1.** Source profiles statistics (Cluster analysis)

| Code   | Source category      | Size              | Profiles |
|--------|----------------------|-------------------|----------|
| CE1-13 | Cooking emissions    | PM <sub>2.5</sub> | 13       |
| SD1-20 | Soil dust            | PM <sub>2.5</sub> | 20       |
| RD1-26 | Road dust            | PM <sub>2.5</sub> | 26       |
| IE1-43 | Industrial emissions | PM <sub>2.5</sub> | 43       |
| VE1-22 | Vehicle emissions    | PM <sub>2.5</sub> | 22       |
| BB1-29 | Biomass burning      | PM <sub>2.5</sub> | 29       |
| CC1-73 | Coal combustion      | PM <sub>2.5</sub> | 73       |

38

39

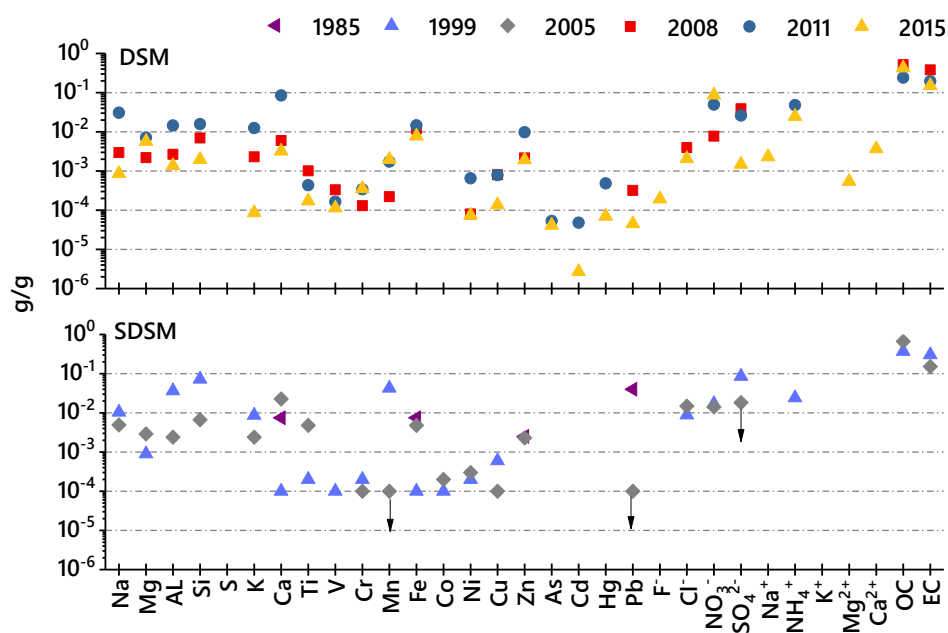

**Figure S1.** Characteristics of chemical profiles for particulate matter emissions from vehicles obtained by different sampling methods. Different colors denote different years of these measurements. DSM and SDSM denote direct sampling method and source dominated sampling method, respectively. Data from the source library of Nankai University, Zhang et al.(2000), Guo et al.(2013), Li et al.(2016), Zhang et al.(2009), Dai et al.(1986), Han et al.(2009) and Bi et al.(2007).
