# Supplementary material for: Characteristics of the main primary source profiles of particulate matter across China from 1987 to 2017
Source: Copernicus journal article supplement (doi:10.5194/acp-19-3223-2019), 2019-03-12
Supplement: Supplementary file 2 [file Profile Data from Nankai Source Library-V1.xlsx]

## Sheet: Sheet1
SOURCE TYPE	SUBTYPE	SAMPLING METHOD	SIZE	DEDUST METHOD	DESULFURIZATION METHOD	Na（g/g）	Mg（g/g）	Al（g/g）	Si（g/g）	S（g/g）	K（g/g）	Ca（g/g）	Ti（g/g）	V（g/g）	Cr（g/g）	Mn（g/g）	Fe（g/g）	Co（g/g）	Ni（g/g）	Cu（g/g）	Zn（g/g）	As（g/g）	Cd（g/g）	Hg（g/g）	Pb（g/g）	F-（g/g）	Cl-（g/g）	NO3-（g/g）	SO42-（g/g）	Na+（g/g）	NH4+（g/g）	K+（g/g）	Mg2+（g/g）	Ca2+（g/g）	OC（g/g）	EC（g/g）
COAL COMBUSTION	INDUSTRIAL BOILER	DILUTION TUNNEL SAMPLING	PM2.5	BAG	DRY	0.0702946	0.010156	0.0307106	0.124567	0.0586828	0.00941075	0.049844	0.000658579	0.000103986	0.00724437	0.00632582	0.0241248		8.66551e-05	0.00362218	0.00244367		0		0.00247834	0.00090389	0.0135655	0.00375599	0.0304659	0.00670654	0.0330316	0.00202337	0.000659163	0.00739758	0.0639792	0.0191091
COAL COMBUSTION	INDUSTRIAL BOILER	DILUTION TUNNEL SAMPLING	PM2.5	ELECTRIC BAG	WET	0.000788155	0.000305239	0.00692027	0.0107312	0.0660114	0.00088041	0.000448747	0.000479499	0	0	0.00229841	0.0137608		0.00636902	0.00798633	0.0293303		9.11162e-05		0.00108656	0.0071973	0	0.151856	0.0216355	0.0764775	0.00981087	0.022192	0.0593814	0.0229996	0	0
COAL COMBUSTION	INDUSTRIAL BOILER	DILUTION TUNNEL SAMPLING	PM2.5	ELECTRIC BAG	WET	0.000187151	4.46927e-05	0.00177793	0.00314455	0.090148	0.000428771	0	2.51397e-05	0	0	2.3743e-05	0.00170251		0.000962291	0.0024183	0.00802374		4.05028e-05		0.000215782	0.00529923	0.000977364	0.28827	0.00567974	0.0668058	0.0062062	0.000238661	0.00475855	0	0	0
COAL COMBUSTION	INDUSTRIAL BOILER	DILUTION TUNNEL SAMPLING	PM2.5	ELECTRIC	DRY			0.0218121	0.0622146	0.0311761	0.0307444	0.144393	0.000758173		0.0153794	0.000961179	0.0320364		0.00234383	0.0031977	0.00968987		0.000273575		0.00449901	0.0131727	0.079612	0.0399938	0.0594542	0.0734112	0.0969225	0.0964109	0.00799499	0.0902042	0.0934055	0.0286095
COAL COMBUSTION	INDUSTRIAL BOILER	DILUTION TUNNEL SAMPLING	PM2.5	ELECTRIC	WET			0.0155467	0.0474077	0.0429948	0.0802541	0.0905735	0.00133959	0.000320933	0.00485444	0.00105454	0.0257578	0.000118939	0.0024172	0.00188447	0.0100179		5.08951e-05		0.0030359	0.00854083	0.124709	0.0389009	0.149591	0.0528688	0.0806715	0.0638819	0.00673253	0.0583532	0.105094	0.022081
COAL COMBUSTION	POWER GENERATION	DILUTION TUNNEL SAMPLING	PM2.5	ELECTRIC	WET	0.00486844	0.0111401	0.0295064	0.0304246	0.0289993	0.00180456	0.192655	0.00143589	0.00013308	0.000911331	0.000854905	0.0257725		0.000166692	0.00134094	0.00486251		0		0	#VALUE!	0.0923	0	0.0323	0.0638	0.0302	0.0204	0	0	0.0671675	0.00719387
COAL COMBUSTION	POWER GENERATION	DILUTION TUNNEL SAMPLING	PM2.5	ELECTRIC	WET	0.0021518	0.00806806	0.00218048	0.0214678	0.0436861	0.00074945	0.00901157	5.5444e-05	5.73559e-06	0.000308766	0.000103241	0.00202849		0	0.000518115	0.000132874		3.82373e-06		0.000100373	0.00013383	0.327752	0.00148912	0.101099	0.000730382	0.140464	0.0027428	0.00413186	0.0113222	0.019027	0.00270583
COAL COMBUSTION	POWER GENERATION	DILUTION TUNNEL SAMPLING	PM2.5	ELECTRIC	DRY	0.000258025	0.00039579	0.00791759	0.00568977	0.000786985	0.000652502	0.0108989	0.000292729	6.87075e-06	0.000184416	2.79206e-05	0.00201291		0.000123192	0.0002147	0.000279294		1.48793e-06		3.66294e-05	0	0.0009	0.0031	0.0003	0.0035	0.0051	0.0033	0.0007	0.0196	0.000522342	0.000473128
COAL COMBUSTION	POWER GENERATION	DILUTION TUNNEL SAMPLING	PM2.5	ELECTRIC BAG	WET	0.00871119	0.0321986	0.0424097	0.0075211	0.0517746	0.00668473	0.334174	0.000360877	6.71607e-05	0.00378518	0.000603551	0.0271696		0.00266941	0.000411023	0.00840225		3.04462e-05		0.000558777	0	0.0389	0.0209	0.094	0.0192	0.0149	0.0105	0.0266	0.0383	0.000890624	0.000805929
COAL COMBUSTION	POWER GENERATION	DILUTION TUNNEL SAMPLING	PM2.5	ELECTRIC	WET	0.00826535	0.0163407	0.0969041	0.0381916		0.00422768	0.0336314	0.00270761	0.000147256	0.00194758	0.00118755	0.0295937	4.37018e-05	0.00180508	0.00147256	0.0023276	5.22522e-05	5.70024e-06			0.00086901	0.010578	0.0382181	0.307447	0.00470265	0.154113	0.00577789	0.00605988	0.0220815	0.272153	0.0427348
COAL COMBUSTION	POWER GENERATION	DILUTION TUNNEL SAMPLING	PM2.5	ELECTRIC	WET	0.0143426	0.030515	0.157274	0.120675		0.00633051	0.0642942	0.0038082	0.000168154	0.00113751	0.000890228	0.0364004	9.39685e-06	0.000464897	0.00113751	0.00163208	6.42942e-05	4.89625e-06			0.000731485	0.0096943	0.0367641	0.263625	0.00712811	0.13618	0.00544202	0.00855984	0.0142242	0.232107	0.0345503
COAL COMBUSTION	POWER GENERATION	RESUSPENDED CHAMBER METHOD	PM2.5	ELECTRIC BAG	WET		0.00291842	0.0481447	0.0482237	0.00410526	0.00289211	0.0170526	0.00258816	0.000152632	0.00327237	0.000386842	0.0293947	2.23684e-05	0.000160526	0.00139605	0.00203816			3.94737e-06	0.000103947	0.000127214	0.000397554	0.000825788	0.00460859	0.0254122	0.0235932	0.00856049	0.0205539	0.317273	1.14575	1.39276
COAL COMBUSTION	POWER GENERATION	RESUSPENDED CHAMBER METHOD	PM2.5	ELECTRIC BAG	WET		0.00466279	0.0796013	0.112857	0.00811628	0.00582226	0.0316279	0.00497674	0.000480066	0.00558804	0.000347176	0.0353654	3.98671e-05	0.000240864	0.00275083	0.0041711	3.65449e-05		3.48837e-05	0.000184385	1.61195e-05	0.000506351	0.000161708	0.00253489	0.000671932	0.000466054	0.000111084	0.000248204	0.00677375	0.0191829	0.0395123
COAL COMBUSTION	POWER GENERATION	RESUSPENDED CHAMBER METHOD	PM2.5	ELECTRIC BAG	WET		0.00435294	0.068914	0.0621493	0.00706335	0.00536878	0.0481674	0.00393213	0.000343891	0.00891629	0.000875566	0.0378507	4.97738e-05	0.00030543	0.00173303	0.049276		5.20362e-05	5.42986e-05	0.00192986	0.000142186	0.00375786	0.000881508	0.00813167	0.000810411	0.000273175	0.000155043	0.000190507	0.00623472	0.0214536	0.0382746
COAL COMBUSTION	POWER GENERATION	RESUSPENDED CHAMBER METHOD	PM2.5	ELECTRIC BAG	WET	0.000686114	0.00791832	0.13839	0.119323	0.0136663	0.00948191	0.0683781	0.00689382	0.000268378	0.00574096	0.0023874	0.0576429	7.23454e-05	0.000294049	0.00292415	0.158996		0.00011902	4.90082e-05	0.00505718	0.000382684	0.0148741	0.00117985	0.0167104	0.00228331	0.00122714	0.00167617	0.000375567	0.00994978	0.0190737	0.0344378
COAL COMBUSTION	POWER GENERATION	RESUSPENDED CHAMBER METHOD	PM2.5	ELECTRIC BAG	WET	0.00224195	0.0102663	0.148815	0.100547	0.0150395	0.0111562	0.0800729	0.00725836	0.000341641	0.00965593	0.00212644	0.0762067	8.26748e-05	0.000224924	0.00249119	0.0611793	6.44377e-05	4.49848e-05		0.00214711	0.000132498	0.00308738	0.000381382	0.0093933	0.00119158	0.000331729	0.00026214	0.000284818	0.00837873	0.0255421	0.0332556
COAL COMBUSTION	POWER GENERATION	RESUSPENDED CHAMBER METHOD	PM2.5	ELECTRIC	WET	0.00446964	0.00453929	0.070625	0.202714		0.00628929	0.0530893	0.00338036	0.000158929	0.00116429	0.0003125	0.02225	0	0.0069	0.00179464	0.0014625	1.42857e-05	2.32143e-05		0.000444643		0.000258518	0	0		0.00184962				0.0790011	0.0513434
COAL COMBUSTION	POWER GENERATION	RESUSPENDED CHAMBER METHOD	PM2.5	ELECTRIC	WET	0.00645196	0.0057758	0.0514235	0.14242		0.00647687	0.049573	0.00274377	0.000163701	0.00212456	0.000345196	0.0286975	0	0.00645	0.00141281	0.000957295	3.20285e-05	1.42349e-05		0.000455516		0.00437704	0.00332398	0.0271158		0.00654444				0.0608551	0.105242
COAL COMBUSTION	POWER GENERATION	RESUSPENDED CHAMBER METHOD	PM2.5	ELECTRIC	WET	0.00699522	0.00946411	0.0654067	0.136019		0.00564115	0.123062	0.00250239	0.000162679	0.00218182	0.000440191	0.0256364	0	0.00905	0.00136842	0.000430622	2.39234e-05	1.91388e-05		0.00022488		0.000308224	0	0		0.0011256				0.0552207	0.0852131
COAL COMBUSTION	POWER GENERATION	RESUSPENDED CHAMBER METHOD	PM2.5	ELECTRIC	WET	0.00337483	0.0039021	0.0726434	0.199678		0.00410909	0.0341538	0.00354266	0.000118881	0.00123776	0.000387413	0.0258042	0	0.00725	0.00175524	0.000388811	1.67832e-05	8.39161e-06		0.000131469		0.00229273	0.00330051	0.0183555		0.00220032				0.0195449	0.0579939
COAL COMBUSTION	POWER GENERATION	RESUSPENDED CHAMBER METHOD	PM2.5	ELECTRIC	WET	0.00386573	0.00383968	0.0629259	0.199599		0.0044008	0.036493	0.00316834	0.000158317	0.00128257	0.000332665	0.022024	0	0.00645	0.00175752	0.000693387	0	1.2024e-05		0.000184369		0	0	0.000627375		0.00236497				0.0264489	0.0362225
COAL COMBUSTION		DILUTION TUNNEL SAMPLING	PM10			0.0164724	0.0058491	0.0905648	0.178441		0.009213	0.116903	0.008393	3.715e-05	0.0001035	0.00026544	0.0178944	2.389e-05	7.331e-05	9.691e-05	0.0005416	1.555e-05	6.1e-07	1.9e-08	5.88e-05			0	0.000440792						0.0856193	0.0870736
COAL COMBUSTION		DILUTION TUNNEL SAMPLING	PM10			0.0270088	0.0027738	0.102996	0.201978		0.015106	0.062205	0.0051557	4.077e-05	5.917e-05	0.0002844	0.0503979	3.092e-05	7.399e-05	7.469e-05	0.0009437	7.81e-06	3.9e-07	1.9e-08	3.97e-05			0	0.000635697						0.143634	0.135651
COAL COMBUSTION		DILUTION TUNNEL SAMPLING	PM10			0.0167692	0.0024723	0.0995578	0.196981		0.009379	0.059345	0.0039567	2.72e-05	4.933e-05	0.00016432	0.0246747	7.125e-05	9.303e-05	3.399e-05	0.0002025	8.76e-06	4e-07	1.9e-08	1.508e-05			0	0.000508352						0.0446232	0.0214281
COAL COMBUSTION		DILUTION TUNNEL SAMPLING	PM10			0.0136528	0.0046431	0.102044	0.194552		0.007636	0.0615615	0.0043164	2.814e-05	5.595e-05	0.0002528	0.0222282	7.86e-06	3.723e-05	3.373e-05	5.094e-05	8.95e-06	2e-07	1.9e-08	1.269e-05			0	0.00346362						0.00584651	0.00548528
COAL COMBUSTION		DILUTION TUNNEL SAMPLING	PM10			0.0189952	0.0022311	0.0890836	0.216641		0.010624	0.0624195	0.0033572	2.111e-05	1.36e-06	0.000158	0.0364179	1.082e-05	7.67e-06	2.465e-05	9.498e-05	4.48e-06	3.9e-07	1.9e-08	9.71e-06			0	0						0.0285434	0.03884
COAL COMBUSTION		DILUTION TUNNEL SAMPLING	PM10			0.0134302	0.0012663	0.0093104	0.0383874		0.0075115	0.008866	0.00161865	1.938e-05	1.759e-05	5.688e-05	0.0025863	1.281e-05	5.321e-05	3.255e-05	8.726e-05	6.42e-06	1.9e-07	1.8e-08	1.443e-05			0	0.000123854						0.0735904	0.112372
COAL COMBUSTION		DILUTION TUNNEL SAMPLING	PM10			0.0164724	0.0016281	0.0126431	0.0422168		0.009213	0.008008	0.004796	2.829e-05	1.127e-05	0.00024648	0.0037047	1.582e-05	1.154e-05	4.528e-05	5.484e-05	6.69e-06	6.1e-07	9.6e-09	1.369e-05			0	0.000414178						0.144079	0.221434
COAL COMBUSTION		DILUTION TUNNEL SAMPLING	PM10			0.016695	0.0015075	0.0084111	0.0440848		0.0093375	0.009152	0.00545545	2.884e-05	1.254e-05	8.216e-05	0.0048231	1.328e-05	1.498e-05	3.641e-05	6.647e-05	5.61e-06	2e-07	1.9e-08	9.03e-06			0	0.000510615						0.234866	0.242065
COAL COMBUSTION		DILUTION TUNNEL SAMPLING	PM10			0.0253764	0.0013266	0.0110561	0.034558		0.014193	0.011583	0.00401665	3.287e-05	1.01e-05	5.688e-05	0.0052425	1.621e-05	4.432e-05	4.349e-05	4.327e-05	5.01e-06	2.1e-07	9.8e-09	5.14e-06			0	0						0.165688	0.269829
COAL COMBUSTION		DILUTION TUNNEL SAMPLING	PM10			0.0102396	0.00021105	0.0054487	0.0499223		0.005727	0.031031	0.00485595	3.71e-05	1.759e-05	0.00020224	0.005592	1.8e-05	3.321e-05	3.476e-05	0.0001846	3.69e-06	2.1e-07	2e-08	1.4e-06			0	0.000292434						0.234488	0.448509
COAL COMBUSTION		RESUSPENDED CHAMBER METHOD	PM10			0.0178822	0.0007236	0.0627394	0.133048		0.0100015	0.0083655	0.00197835	7.744e-05	0.0003191	0.00010112	0.0062211	3.892e-05	0.0001103	0.0007475	0.003117	1.476e-05	8.8e-07	3.4e-08	0.0005035			0	0.206115						0	0
COAL COMBUSTION		RESUSPENDED CHAMBER METHOD	PM10			0.0132818	0.0077787	0.0832646	0.0875158		0.0074285	0.081081	0.00209825	3.268e-05	0.00238	0.0008216	0.0217389	0.0001498	0.001133	0.004466	0.01768	3.172e-05	1.02e-05	1.9e-07	0.003905			0	0						0.115064	0.0423181
COAL COMBUSTION		RESUSPENDED CHAMBER METHOD	PM10			0.0180306	0.0063315	0.0933156	0.0802773		0.0100845	0.062634	0.0017985	6.5e-05	0.001016	0.0007584	0.0213195	0.0001228	0.0008207	0.002219	0.011954	3.575e-05	0	1.6e-07	0.002408			0	0						0.119541	0.0720298
COAL COMBUSTION		RESUSPENDED CHAMBER METHOD	PM10			0.0127624	0.0075978	0.102943	0.095735		0.007138	0.075504	0.0027577	1.816e-05	0.0005116	0.00046768	0.0160071	4.973e-05	0.0002485	0.0009227	0.0007275	3.947e-05	1e-07	6.4e-08	0.0002091			0	0.070523						0.0533477	0.0348566
COAL COMBUSTION		RESUSPENDED CHAMBER METHOD	PM10			0.0175854	0.0054873	0.0719969	0.0832194		0.0098355	0.0574145	0.00257785	5.144e-05	0.001983	0.0004108	0.0220185	0.0001973	0.001006	0.00195	0.019574	7.218e-05	1e-07	2.5e-07	0.002458			0	0.210859						0.0475802	0.0547536
COAL COMBUSTION		RESUSPENDED CHAMBER METHOD	PM10			0.0142464	0.0107334	0.0824182	0.0909716		0.007968	0.072501	0.00365695	7.12e-05	0.0006424	0.00158	0.0067803	7.979e-05	0.001196	0.001013	0.00129	6.757e-05	1.2e-07	2.1e-07	0.0003791			0	0.166975						0.148386	0.0704926
INDUSTRIAL PROCESS EMISSIONS	IRON AND STEEL		PM2.5			0	0	0.03565	0.055		0.1125	0	0	0	0	0	0.2421	0	0	0	0	0	0	0	0	0	0	0	0.19435	0	0	0	0	0.09685	0.0365	0.0105
INDUSTRIAL PROCESS EMISSIONS	IRON AND STEEL		PM2.5			0	0	0.1514	0.22895		0	0.0895	0	0	0	0	0.21675	0	0	0	0	0	0	0	0	0	0	0	0	0	0	0	0	0	0	0
INDUSTRIAL PROCESS EMISSIONS	IRON AND STEEL		PM2.5			0	0	0.1003	0.13		0.2258	0.11205	0	0	0	0	0.2251	0	0	0	0	0	0	0	0	0	0.0837	0	0.14025	0	0	0	0	0	0.10215	0
INDUSTRIAL PROCESS EMISSIONS	CEMENT		PM2.5			0	0	0.095	0		0	0.128	0	0	0	0	0	0	0	0	0	0	0	0	0	0	0	0	0.108	0	0	0	0	0	0.314	0
INDUSTRIAL PROCESS EMISSIONS	CEMENT		PM2.5			0	0	0.114	0.0441		0	0.0481	0	0	0	0	0	0	0	0	0	0	0	0	0	0	0	0	0.4838	0	0	0	0	0	0.0712	0
INDUSTRIAL PROCESS EMISSIONS	CEMENT		PM2.5			0	0	0.0917	0.0619		0	0.179	0	0	0	0	0	0	0	0	0	0	0	0	0	0	0	0	0.115	0	0	0	0	0	0.11	0
INDUSTRIAL PROCESS EMISSIONS	CEMENT		PM2.5			0	0	0.1732	0		0	0.099	0	0	0	0	0	0	0	0	0	0	0	0	0	0	0	0	0.118	0	0	0	0	0	0.0615	0
INDUSTRIAL PROCESS EMISSIONS	CEMENT		PM2.5			0	0	0	0		0	0	0	0	0	0	0	0	0	0	0	0	0	0	0	0	0	0	0.144	0	0	0	0	0	0.1796	0
INDUSTRIAL PROCESS EMISSIONS	CEMENT		PM2.5			0	0	0	0		0	0	0	0	0	0	0	0	0	0	0	0	0	0	0	0	0	0	0	0	0	0	0	0	0.1924	0
INDUSTRIAL PROCESS EMISSIONS	COKING		PM2.5			0	0	0.095	0		0	0.128	0	0	0	0	0	0	0	0	0	0	0	0	0	0	0	0	0.108	0	0	0	0	0	0.314	0
INDUSTRIAL PROCESS EMISSIONS	COKING		PM2.5			0	0	0.114	0		0	0.179	0	0	0	0	0	0	0	0	0	0	0	0	0	0	0	0	0.115	0	0	0	0	0	0	0
FUGITIVE DUST	SOIL FUGITIVE DUST	RESUSPENDED CHAMBER METHOD	PM2.5			0.0255982	0.0151553	0.0457078	0.276941		0.00967123	0.09379	0.001379	6.84932e-05	0.00234703	0.000899543	0.0460274	1.36986e-05	0.000415525	0.00574886	0.00131507	1.82648e-05	4.56621e-05		0.000200913	8.46096e-05	0.000876375	0.00129533	0.0103454	0.000858944	0.000277503	0.000499442	0.000525438	0.00607613	0.0470246	0.00522496
FUGITIVE DUST	SOIL FUGITIVE DUST	RESUSPENDED CHAMBER METHOD	PM2.5			0.0196602	0.0191931	0.0448649	0.174131		0.00943243	0.0777606	0.00105019	3.4749e-05	0.00157915	0.000571429	0.03561	1.1583e-05	0.000413127	0.00433977	0.00627413	0.000204633	3.861e-06		0.000258687	6.18316e-05	0.000965361	0.000861198	0.00889949	0.000577147	0.00133019	0.000531069	0.000443804	0.00513811	0.0420304	0.00336804
FUGITIVE DUST	SOIL FUGITIVE DUST	RESUSPENDED CHAMBER METHOD	PM2.5			0.0157701	0.0212874	0.0538161	0.122851		0.00986897	0.0874023	0.0014092	5.28736e-05	0.00135862	0.000871264	0.0409195	1.14943e-05	0.000248276	0.00270345	0.00244138	6.2069e-05	2.29885e-06	2.29885e-06	0.000154023	4.27037e-05	0.00139838	0.00312936	0.0074881	0.000655149	0.00029483	0.000686516	0.000725837	0.0129589	0.0438763	0.0045216
FUGITIVE DUST	SOIL FUGITIVE DUST	RESUSPENDED CHAMBER METHOD	PM2.5			0.0106457	0.0186415	0.0526471	0.08493		0.00887955	0.0506863	0.00126471	5.88235e-05	0.00101261	0.000715686	0.0359804	1.2605e-05	0.000161064	0.00180532	0.0022549	0.000120448	1.40056e-06		0.000134454	3.18248e-05	0.000760422	0.00132751	0.00595574	0.000475059	0.00014769	0.000360987	0.000619709	0.0105987	0.0393839	3.51329e-05
FUGITIVE DUST	SOIL FUGITIVE DUST	RESUSPENDED CHAMBER METHOD	PM2.5			0.0202139	0.0252912	0.0478351	0.155567		0.0104974	0.0926031	0.00129639	5.41237e-05	0.00182474	0.000850515	0.0395361	1.28866e-05	0.000280928	0.0033067	0.00381701	0.000180412	5.15464e-06		0.000188144	7.44531e-05	0.00232337	0.00111168	0.0147228	0.00100461	0.000244176	0.00065689	0.000769052	0.0129174	0.0488995	0.00489578
FUGITIVE DUST	SOIL FUGITIVE DUST	RESUSPENDED CHAMBER METHOD	PM2.5			0.018812	0.0192089	0.0685379	0.145822		0.0125953	0.0860836	0.00188251	8.87728e-05	0.00201828	0.000616188	0.0489295	1.30548e-05	0.000318538	0.00320627	0.00405222	0.000164491	2.61097e-06		0.000185379	8.84509e-05	0.00119733	0.00173636	0.00897433	0.00101569	0.00140537	0.000851251	0.00067755	0.00861362	0.0307022	4.89669e-05
FUGITIVE DUST	SOIL FUGITIVE DUST	RESUSPENDED CHAMBER METHOD	PM2.5			0.0332836	0.017709	0.100567	0.25772		0.0186642	0.0873134	0.00283657	0.0109328	0.00172239	0.000499478	0.0126119		6.52985e-05	0.00298507	0.00141119				0.000423657		0.00244382	0.00368843	0.00702629		0.00384348				0.0256224	0.007536
FUGITIVE DUST	SOIL FUGITIVE DUST	RESUSPENDED CHAMBER METHOD	PM2.5			0.0487531	0.0117086	0.06956	0.252363		0.0198519	0.039	0.00473951		0.00277284	0.000638395	0.0207407		0.000128395	0.00344691	0.00722099				0.00045963		0.00219992	0.00485909	0.00695866		0.00288095				0.0308617	0.00979522
FUGITIVE DUST	SOIL FUGITIVE DUST	RESUSPENDED CHAMBER METHOD	PM2.5			0.0207948	0.011179	0.0559242	0.195227		0.0120087	0.0269258	0.00297205	0.00974672	0.00156288	0.000495197	0.020738		0.000280524	0.00188079	0.00162227				0.000226026		0.000707452	0.00157328	0.0041633		0.0014359				0.0243685	0.00883531
FUGITIVE DUST	SOIL FUGITIVE DUST	RESUSPENDED CHAMBER METHOD	PM2.5			0.0290608	0.00964641	0.0682963			0.0163425	0.0260276	0.00263702	0.0119171	0.00144862	0.000415691	0.0166906		9.12707e-05	0.0018663	0.0026989				0.000199613		0.0015012	0.00362409	0.00551441		0.00135849				0.037206	0.00426012
FUGITIVE DUST	SOIL FUGITIVE DUST	RESUSPENDED CHAMBER METHOD	PM2.5			0.0428131	0.0133178	0.0571765	0.25427		0.0218598	0.0485607	0.00396355	0.0115047	0.00306729	0.000676075	0.0259907		7.65421e-05	0.00285234	0.00912056				0.000615794		0.000674338		0.00423412						0.021888	0.0052752
FUGITIVE DUST	SOIL FUGITIVE DUST	RESUSPENDED CHAMBER METHOD	PM2.5			0.009079	0.00692931	0.0730917			0.00941996	0.0168482	0.00128981	0.00362786	0.000552391	0.000490644	0.0154345		9.55301e-05	0.000258836	0.00268191				0.00014131		0.00130258	0.00441279	0.00773498		0.00104261				0.0283308	0.00629574
FUGITIVE DUST	SOIL FUGITIVE DUST	RESUSPENDED CHAMBER METHOD	PM2.5			0.0165344	0.00930153	0.0557054	0.25691		0.0132748	0.0241221	0.00193702	0.00463359	0.00109847	0.00046374	0.0149771		6.30916e-05	0.000443511	0.012771				0.00025584		0.00103755	0.002501	0.00618547		0.00378289				0.0261711	0.00933737
FUGITIVE DUST	SOIL FUGITIVE DUST	RESUSPENDED CHAMBER METHOD	PM2.5			0.0235809	0.0155104	0.0484641			0.0156349	0.0389378	0.00223527	0.00577593	0.00126639	0.00046473	0.0164813		0.000126266	0.000345768	0.00124481				0.000692946		0.00234284		0.00764088		0.00271186				0.0280286	0.0122312
FUGITIVE DUST	SOIL FUGITIVE DUST	RESUSPENDED CHAMBER METHOD	PM2.5			0.0181745	0.00947642	0.0977143	0.243169		0.0112028	0.0156132	0.00156509	0.00462217	0.00189717	0.000573113	0.0214009		4.85849e-05	0.00201368	0.00809906				0.000337877		0.00163129	0.0029764	0.0085798		0.00166116				0.0316484	0.00913455
FUGITIVE DUST	SOIL FUGITIVE DUST	RESUSPENDED CHAMBER METHOD	PM2.5			0.020089	0.0131992	0.0836262	0.230786		0.0121864	0.0198729	0.00217203	0.00589831	0.00156949	0.000475847	0.0196864		0.000163136	0.000516102	0.00116356				0.000227458		0.00302345	0.00394895							0.0282896	0.00991579
FUGITIVE DUST	ROAD DUST	RESUSPENDED CHAMBER METHOD	PM2.5			0.00116607																0.000100358	7.16846e-06	5.49582e-05		0.000166566	0.0122336	0.00795125	0.0215915	0.00313055	0.00269503	0.00184445	0.00193816	0.0489794	0.123182	0.00295529
FUGITIVE DUST	ROAD DUST	RESUSPENDED CHAMBER METHOD	PM2.5				0.0233367	0.0638191	0.0899296	0.0151759	0.0135678	0.169849	0.00273367	0.000150754	0.0142915	0.00156784	0.0867337		0.000954774	0.00238191	0.00878392				0.000110553	0.000149998	0.00394424	0.00289682	0.00756627	0.00518542	0.00379203	0.0023673	0.00256638	0.0728554	0.159795	0.00526073
FUGITIVE DUST	ROAD DUST	RESUSPENDED CHAMBER METHOD	PM2.5				0.0114571	0.0775143	0.0667857	0.0118	0.0104286	0.146286	0.00168571	8.57143e-05	0.0329	0.00178571	0.0900714	1.42857e-05	0.00135714	0.00272857	0.00582857					0.000278647	0.0005168	0.000206987	0.00136497	0.00574161	0.00315248	0.00046964	0.00334361	0.0943464	0.254789	0.0103171
FUGITIVE DUST	ROAD DUST	RESUSPENDED CHAMBER METHOD	PM2.5				0.00693318	0.0525261	0.0239541		0.010613	0.0130024	0.00178331	8.34299e-05	0.000281962	0.000702202	0.0445848		7.64774e-05	0.000107764	7.30012e-05					0.000133713	0.0011751	0.0010142	0.0196338	0.000644515	0.000143105	0.000621571	0.00168837	0.0259857	0.0189814	0.0166928
FUGITIVE DUST	ROAD DUST	RESUSPENDED CHAMBER METHOD	PM2.5			0.0030641	0.00698291	0.0249017	0.028812		0.00378205	0.0307094	0.000717949	4.2735e-05	0.00218803	0.000517094	0.0318462	8.54701e-06	0.0005	0.00170513	0.000653846		0		0.000102564	6.34373e-05	0.00154431	0.001898	0.0124344	0.000881944	0.000357254	0.00108538	0.00292893	0.0304938	0.0381795	0.00278318
FUGITIVE DUST	ROAD DUST	RESUSPENDED CHAMBER METHOD	PM2.5			0.00586854	0.00816432	0.0360892	0.0423991		0.00524883	0.0379484	0.000849765	6.10329e-05	0.00282629	0.000633803	0.0358498	1.40845e-05	0.000474178	0.00219249	0.00106573		0	9.38967e-06	0.000117371	7.50621e-05	0.00152063	0.00260518	0.0101655	0.000888769	0.000272031	0.000840614	0.001454	0.0289943	0.0920823	0.00774047
FUGITIVE DUST	ROAD DUST	RESUSPENDED CHAMBER METHOD	PM2.5			0.00446185	0.00783534	0.0321365	0.0354418		0.00482329	0.0376345	0.000767068	2.40964e-05	0.00254618	0.000610442	0.0338675	1.20482e-05	0.000449799	0.00182731	0.00210843		0	4.01606e-06	0.000148594	6.25741e-05	0.00160476	0.00230005	0.0127947	0.000758225	0.000391427	0.000646609	0.00123778	0.0268743	0.0483632	0.00433103
FUGITIVE DUST	ROAD DUST	RESUSPENDED CHAMBER METHOD	PM2.5			0.0190059	0.0132941	0.0290176	0.223235		0.00710588	0.0864118	0.000847059	3.52941e-05	0.00277059	0.000564706	0.0348882	5.88235e-06	0.000552941	0.00484118	0.00211176	2.94118e-05	5.88235e-06		0.000217647	9.22479e-05	0.00224731	0.00158158	0.0171956	0.00117358	0.000265779	0.00117222	0.00145741	0.0249378	0.0732667	0.00561013
FUGITIVE DUST	ROAD DUST	RESUSPENDED CHAMBER METHOD	PM2.5			0.015151	0.0133906	0.0403698	0.159323		0.00788021	0.0815625	0.000984375	2.08333e-05	0.00302083	0.000755208	0.0388646	1.04167e-05	0.000645833	0.00384896	0.00171354		2.08333e-05	5.20833e-06	0.000270833	9.38441e-05	0.00217625	0.00181415	0.0138278	0.00115403	0.000293845	0.00124269	0.00149899	0.0274009	0.0566342	0.00723152
FUGITIVE DUST	ROAD DUST	RESUSPENDED CHAMBER METHOD	PM2.5			0.0144612	0.013931	0.0402241	0.141681		0.00894828	0.0822414	0.00109914	4.31034e-05	0.00304741	0.000702586	0.0410991	8.62069e-06	0.000443966	0.00318534	0.00272414		4.74138e-05		0.000280172	8.89662e-05	0.00227877	0.00254948	0.017932	0.00146618	0.000399098	0.00145749	0.00177853	0.031805	0.069496	0.0117279
FUGITIVE DUST	ROAD DUST	RESUSPENDED CHAMBER METHOD	PM2.5			0.022482	0.0166115	0.0401511	0.243813		0.00936691	0.105899	0.00108633	3.59712e-05	0.00658273	0.000676259	0.0533813	1.43885e-05	0.000705036	0.00561151	0.00436691	6.47482e-05	7.19424e-06		0.000388489	0.000237298	0.00272445	0.00423458	0.0174826	0.00113235	0.000841393	0.000845296	0.00111278	0.0190773	0.0548221	0.00850971
COOKING EMISSION	HOT POT		PM2.5			0.00175674	0.00165533	0.00417185	0.00536304	0.00990898	0.00229256	0.0109734	0.000417849	0	0.00031062	0.000100926	0.00381546		0.000209897	0.000309109	0.000344773	0.000150536			9.6633e-05		0.00158759	0.0292048	0.0235113	0.00191272	0.021803	0.00370296	0.000632037	0.00264147	0.464228	0.0193843
COOKING EMISSION	CHINESE COOKING STYLE		PM2.5			0.00198267	0.0010811	0.00193844	0.0029881	0.0108593	0.00187805	0.00675808	0.000386751	0	0.000416835	0.000112988	0.0057127		0.000275702	0.00012232	0.000360605	0.000133016			7.30189e-05		0.00323857	0.0222994	0.0116796	0.00349095	0.014655	0.00268798	0.000179796	0.00159418	0.466408	0.0191939
COOKING EMISSION	BARBECUE		PM2.5			0.000266677	0.000445922	0.00066149	0.000840705	0.00205437	0.0020578	0.00449382	2.5453e-05	0	7.2032e-05	1.9986e-05	0.00084805		3.73785e-05	5.34415e-05	0.000162435	1.58194e-05			2.49618e-05		0.0023673	0.00260981	0.0027582	0.000303472	0.00153499	0.00271859	8.60751e-05	0.00123742	0.522219	0.0103033
COOKING EMISSION	EATERY		PM2.5			0.00287476	0.00279554	0.0042645	0.00653195	0.00656914	0.00333865	0.0185412	0.00104103	0	0.000470587	0.00011434	0.00559426		0.000277042	0.000198897	0.000555211	0.000118093			0.000194336		0.00347136	0.0118611	0.0101727	0.00251751	0.010054	0.00195035	0.000553369	0.00529435	0.540759	0.017041
COOKING EMISSION	PURE EDIBLE OIL		PM2.5			0.002	0.00076				0.0011	0.0019				1.4e-05	0.0011		1.3e-05	1.6e-05	0.00014	6e-06			2.8e-05		0.00025	0.0016	0.0018	0.0005		0.00037			0.63	0.0042
COOKING EMISSION	HOTEL		PM2.5			0.000357243	0.0004274	0.000449245	0.00124633	0.0018968	0.000801148	0.0155229	3.09861e-05	5.72302e-07	0.00014622	0.00011	0.00191204		6.18199e-05	4.91846e-05	0.000860889				2.90753e-05		0.00213155	0.00390045	0.00718856	0.00228575	0.00540037	0.000702802	6.19583e-05	0.00109995	0.483639	0.0139444
VEHICLE EMISSION	GASOLINE	DILUTION TUNNEL SAMPLING	PM10			3.01826e-05	0.00048189	0.00110807		0	5.71254e-05	0.00508343	1.49386e-05		6.49894e-05	0.00239885	0.00123285	0		0.000291934	0.00279979			0.000199094	4.35652e-05		0.00271946	0.213905	0.00166815	0.000233598	0.0554984	0	0.000614566	0.00519018	0.405588	0.0286093
VEHICLE EMISSION	GASOLINE	DILUTION TUNNEL SAMPLING	PM10			7.93129e-05	0.00091557	0.00297333		0	7.44219e-05	0.00751891	4.61513e-05		0.00145807	0.00772873	0.0668901	0		0.000741255	0.00601506			0.000176735	0.000121422		0.00594804	0.161446	0.00190763		0.0425845	0	0.000776263	0.0053519	0.254545	0.125383
VEHICLE EMISSION	GASOLINE	DILUTION TUNNEL SAMPLING	PM10			0.000153067	0.00096441	0.00139359		0		0.00190243	1.14135e-05	2.28611e-06	1.61723e-05	0.000957497	0.000306464	0		3.24716e-05	0.000494405		3.20513e-06	4.84445e-05	6.54094e-05	0.000272479	0.00175454	0.0187202		0.00298557		0	0.000621278	0.0038457	0.565423	0.0620024
VEHICLE EMISSION	GASOLINE	DILUTION TUNNEL SAMPLING	PM10			0.0001232		0.00210837		0	0.000100783	0.0107225	1.89332e-05		0.000395224	0.00628727	0.00642537	0	9.49612e-05	0.000248246	0.00503442	3.12846e-05		5.63139e-05	7.03186e-05		0.00217091	0.28991	0.00166815	0.00033624	0.0747336	0	0.000468161	0.00887404	0.25562	0.091879
VEHICLE EMISSION	LIGHT-DUTY DIESEL	DILUTION TUNNEL SAMPLING	PM10			0.000108272	0.000307778	0.00179826	0.00197291	0		0.00130154	0.00169671	0.000340001	0.000618733		0.00121986	0		3.3596e-05	0.000948829	1.83951e-05		0.000123157	4.0324e-05		0.00122181	0.0731684	0.00190763	0.00120341	0.00181969	0	0.000323159	0.00204396	0.407189	0.187637
VEHICLE EMISSION	LIGHT-DUTY DIESEL	DILUTION TUNNEL SAMPLING	PM10			0.00363178	0.0163822	0.000477868		0		0.000462273	1.32216e-05		3.34549e-06	3.15361e-06	0.000313908	0	0.000123405	1.75608e-05	0.000327075	5.36284e-05	2.20832e-06	1.28827e-05			0.00131862	0.0419019		0.0032671	0.00378183	0	0.000545962	0.00258924	0.453567	0.211202
VEHICLE EMISSION	LIGHT-DUTY DIESEL	DILUTION TUNNEL SAMPLING	PM10			0.00180228	0.0113539	0.000212815		0		0.000304349	6.36264e-06		5.35831e-06	1.30191e-05	0.000113997	0		1.51145e-05	0.000257378	5.27863e-05		1.36087e-06	9.61152e-06		0.00137376	0.0327891		0.00287587	0.00508092	0	0.000407902	0.00213436	0.570659	0.161777
VEHICLE EMISSION	LIGHT-DUTY DIESEL	DILUTION TUNNEL SAMPLING	PM10			0.000134687	0.000262605	0.00170983		0	0.000111227	0.00394984	2.51318e-05		3.39138e-05	2.27729e-05	0.000693191	0		4.66194e-05	0.00217552			7.38774e-05	4.16815e-05	0.000206499	0.0014418	0.0188133		0.00213823		0	0.000506031	0.00339665	0.392201	0.209521
VEHICLE EMISSION	HEAVY-DUTY DIESEL	DILUTION TUNNEL SAMPLING	PM10			0.00312695	0.0200709	0.00140195		0		0.00152977	3.51571e-05		0.00132562	0.000244615	0.00792053	0	7.11662e-06	8.4469e-06	0.000921	5.89991e-05		1.8543e-06			0.00100229	0.0486964		0.000886939	0.00778093	0	0.00038645	0.0023013	0.454048	0.173744
VEHICLE EMISSION	HEAVY-DUTY DIESEL	DILUTION TUNNEL SAMPLING	PM10			0.000198058	0.000563008	0.000823965		0		0.00125152	1.07755e-05		1.00987e-05	2.83476e-05	0.000434744	0		5.87306e-05	0.00078122	3.36495e-05		8.78922e-06	1.44594e-05	0.000208414	0.00189615	0.0246305		0.00551275		0	0.000593069	0.00304681	0.498703	0.166833
VEHICLE EMISSION	HEAVY-DUTY DIESEL	DILUTION TUNNEL SAMPLING	PM10			0.000131279		0.000984971		0		0.00154119	1.45237e-05	8.32877e-07	2.28105e-06		0.000470835	0		1.09207e-05	0.00158169				2.24092e-06	8.66903e-05	0.00185913	0.0347229	0.000264948	0.00364535	0.00640185	0	0.000710255	0.00215104	0.429984	0.239306
VEHICLE EMISSION	GASOLINE	DIRECT SAMPING FROM EXHAUST PIPE	PM10			0.034208	0.005954	0.051551			0.01209	0.006997				0.000199	0.012364			0.000214	0.001571				0.000153		0.006505	0.058563	0.028479		0.055711				0.480983	0.048569
VEHICLE EMISSION	LIGHT-DUTY DIESEL	DILUTION TUNNEL SAMPLING	PM10			0.032917	0.004858	0.006333	0.009688		0.009046	0.077875	0.000254	0.000233	0.000265	0.000496	0.010067		0.000167	0.000517	0.008967	3.4e-05	7.9e-05	7.3e-05				0.012096	0.011933		0.009259				0.209833	0.345889
VEHICLE EMISSION	HEAVY-DUTY DIESEL	DILUTION TUNNEL SAMPLING	PM10			0.036595	0.009931	0.005814	0.012117		0.015739	0.135179	0.000423	0.000324	0.000133	0.000524	0.007457		0.000333	0.000455	0.013155	3e-05	8.3e-05	0.000114				0.02766	0.022761		0.019504				0.226212	0.207121
VEHICLE EMISSION	HEAVY-DUTY DIESEL	DILUTION TUNNEL SAMPLING	PM10			0.026496	0.004709	0.009517	0.010817		0.006331	0.053815	0.000361	3.3e-05	0.000508	0.000366	0.011394		0.00042	0.001296	0.007978	9e-06	2.5e-05	0.000244				0.010675	0.013016		0.010299				0.176143	0.40619
VEHICLE EMISSION	LIGHT-DUTY GASOLINE	DILUTION TUNNEL SAMPLING	PM10			0.027254	0.00665	0.022807	0.020471		0.012668	0.062775	0.000512	6.9e-05	0.000467	0.002967	0.020474		0.001012	0.001009	0.008417	7.7e-05	2.1e-05	0.000848				0.07856	0.03414		0.080946				0.268495	0.114884
VEHICLE EMISSION	HEAVY-DUTY GASOLINE	DILUTION TUNNEL SAMPLING	PM10			0.017672	0.005378	0.014672	0.016172		0.009702	0.052234	0.00042	5.8e-05	0.000429	0.003126	0.01789		0.000949	0.000833	0.007506	7.9e-05	1.9e-05	0.000892				0.077132	0.037181		0.08302				0.311602	0.089673
VEHICLE EMISSION	AVERAGE	DILUTION TUNNEL SAMPLING	PM10			0.027009	0.006618	0.022599	0.020361		0.012592	0.062505	0.00051	6.9e-05	0.000466	0.002971	0.020408		0.00101	0.001004	0.008394	7.7e-05	2.1e-05	0.000849				0.078523	0.034218		0.080999				0.269598	0.114238
VEHICLE EMISSION		DIRECT SAMPING FROM EXHAUST PIPE	PM10			0.00296	0.00219	0.00266	0.00694		0.00231	0.00599	0.00101	0.00033	0.00013	0.00022	0.01184		8e-05	0.0008	0.00216	0			0.00032		0.00396	0.00774	0.03872						0.5167	0.382
VEHICLE EMISSION		SAMPLING AT UNDERGROUND PARKING LOT	PM10			0.0104	0.0009	0.0365	0.0722		0.0087	0.0001	0.0002	0.0001	0.0002	0.0426	0.0001	0.0001	0.0002	0.0006	0				0		0.0088	0.0171	0.0857		0.0242				0.3705	0.3036
VEHICLE EMISSION		SAMPLING AT UNDERGROUND PARKING LOT	PM10			0.0049	0.0029	0.0024	0.0067		0.0024	0.0227	0.0048		0.0001	0.0001	0.0048	0.0002	0.0003	0.0001	0.0023				0.0001		0.0148	0.0142	0.0183						0.669	0.1524
BIOMASS BURNING	OPEN BURNING		PM2.5			0.0078892	0.0006633	0.0020471	0.0025978	3e-07	0.0025945	0.0042143	-	9.2e-06	4.6e-06	9.3e-06	0.0004196	2.72e-05	6.1e-06	0.0003254	4.87e-05	1.22e-05	0	0	1.22e-05			0.000403	0.001085		0.001987				0.4717	0.0152
BIOMASS BURNING	OPEN BURNING		PM2.5			0.0198591	0.0017004	0.0051882	0.0050244	6e-07	0.0131106	0.0102143	-	1.04e-05	4.3e-06	1.73e-05	0.0022894	7.45e-05	5.7e-06	0.0004524	0.0001082	2.15e-05	0	0	2.08e-05			0.000451	0.001476		0.008176				0.5033	0.0449
BIOMASS BURNING	OPEN BURNING		PM2.5			0.0093298	0.0008743	0.0025279	0.0019717	2e-07	0.0072399	0.0044643	-	9.4e-06	1.8e-06	8.4e-06	0.0003392	2.97e-05	2.3e-06	0.0002693	5.75e-05	1.21e-05	0	0	1.27e-05			0.000681	#VALUE!		0.001562				0.4777	0.0286
BIOMASS BURNING	OPEN BURNING		PM2.5			0.0608716	0.0068369	0.015721	0.0074608	1.4e-06	0.0659413	0.0302112	-	7.7e-06	8.3e-06	2.58e-05	0.0019247	0.0014609	0.0003071	0.0011304	0.000805	1.35e-05	0	0	1.57e-05			0.00159	0.001741		0.038643				0.3709	0.0859
BIOMASS BURNING	BIOMASS BURNING BOILER	RESUSPENDED CHAMBER METHOD	PM2.5				0.0116109	0.0209004	0.024722	0	0.00924573	0.0387133	0.000499295	4.88294e-08	1.19651e-06	4.19226e-07	1.55896e-05	3.43198e-09	3.00537e-09	1.22881e-07	0	1.68082e-08	6.6198e-09	0	1.77163e-07	0.000337344	0.0381461	1.86722e-05	0.0356564	0.00774896	0	0.0334407	0.00644315	0.111916	0.0268498	0.0226724
BIOMASS BURNING	BIOMASS BURNING BOILER	RESUSPENDED CHAMBER METHOD	PM2.5				0.0344766	0.0166583	0.0326231	0	0.0202852	0.184699	0.000502161	5.23221e-08	2.46528e-07	2.90938e-06	1.00975e-05	7.76951e-09	3.90502e-09	7.59627e-08	0	2.44822e-08	9.06445e-10	0	1.52967e-07	0	0.0163221	0.000135678	0.0253613	0.00677638	0	0.0268673	0.00764171	0.136048	0.0181016	0.0324414
BIOMASS BURNING	BIOMASS BURNING BOILER	RESUSPENDED CHAMBER METHOD	PM2.5				0.0356914	0.019907	0.0517721	0	0.0252171	0.20196	0.000988372	4.54104e-08	7.20632e-07	3.14718e-06	1.09337e-05	8.36452e-09	1.91626e-08	8.52459e-08	0	2.45214e-08	1.22648e-09	0	2.40356e-07	0	0.0230488	7.90698e-05	0.0314116	0.0109628	0	0.0289186	0.0161581	0.180467	0.0239714	0.0238057
BIOMASS BURNING	BIOMASS BURNING BOILER	RESUSPENDED CHAMBER METHOD	PM2.5				0.00489	0.0136909	0.0113509	0	0.0680813	0.0226688	0.000400909	7.46455e-08	8.19131e-07	1.25137e-07	5.1418e-06	2.34687e-09	1.46202e-07	1.49288e-07	1.95362e-06	1.28412e-08	3.44186e-09	0	2.94733e-07	0.00101455	0.0632373	0	0.0196036	0.01647	0	0.0468845	0.00249818	0.0128482	0.0626875	0.456431
BIOMASS BURNING	BIOMASS BURNING BOILER	RESUSPENDED CHAMBER METHOD	PM2.5				0.00464634	0.0134043	0.0165319	0	0.0455671	0.0340427	0.00194681	3.77798e-08	1.17246e-06	4.35571e-07	9.87289e-06	2.72952e-10	3.02837e-07	1.41712e-07	0	1.88124e-08	4.60956e-09	0	2.72487e-07	0	0.0808085	6.06383e-05	0.0318766	0.0189064	0.00144255	0.0669	0.00427021	0.0234479	0.0461341	0.335415
BIOMASS BURNING	BIOMASS BURNING BOILER	RESUSPENDED CHAMBER METHOD	PM2.5				0.00532143	0.0117907	0.0219837	0	0.060625	0.0245536	0.000415116	8.54145e-08	1.41106e-06	2.28686e-07	9.18951e-06	2.23511e-09	1.3924e-07	1.42179e-07	1.86059e-06	1.83605e-08	2.99563e-09	0	2.35392e-07	0.00236512	0.163758	0.000422093	0.0822523	0.0413826	0.0125756	0.120255	0.00359302	0.0312802	0.0645238	0.367196
BIOMASS BURNING	BIOMASS BURNING BOILER	RESUSPENDED CHAMBER METHOD	PM2.5				0.0038617	0.00588571	0.0180057	0	0.0652819	0.0227394	0.000431429	7.16828e-08	1.2904e-06	1.6179e-07	6.66545e-06	1.28366e-09	1.24427e-07	3.52209e-07	1.66265e-06	1.39926e-08	4.52166e-09	0	3.10031e-07	0.00191143	0.0930029	0	0.0317029	0.0229686	0.00242286	0.0694771	0.00276571	0.0210143	0.0718085	0.433814
BIOMASS BURNING	BIOMASS BURNING BOILER	RESUSPENDED CHAMBER METHOD	PM2.5				0.0184687	0.0260854	0.0302122	0	0.0225469	0.214734	0.000190244	7.84037e-08	6.82701e-06	8.4386e-06	2.44325e-05	1.04698e-08	0	1.39347e-06	0	7.67348e-08	6.26417e-09	0	1.82993e-07	0.000735366	0.0361427	0.00539634	0.108252	0.00662927	0	0.0143634	0.00743049	0.101433	0.065875	0
BIOMASS BURNING	BIOMASS BURNING BOILER	RESUSPENDED CHAMBER METHOD	PM2.5				0.00496	0.0589818	0.110095	0	0.00152	0.03832	0.00471273	5.88542e-08	8.73949e-06	4.07709e-06	3.02657e-05	5.33533e-09	0	1.38268e-05	0	1.31164e-08	2.58356e-09	0	8.69323e-08	0	0.0239127	0.00647455	0.0762436	0.0143727	0	0.00852545	0.00715091	0.0877636	0.08308	0
BIOMASS BURNING	BIOMASS BURNING BOILER	RESUSPENDED CHAMBER METHOD	PM2.5				0.0127941	0.0250421	0.0397832	0	0.0123971	0.139456	0.000941053	4.96325e-08	5.19847e-06	5.85602e-06	1.80872e-05	5.78229e-09	0	3.23898e-06	0	4.17646e-08	3.72757e-09	0	8.96205e-08	0.000637895	0.05562	0.00374526	0.177073	0.0665305	0	0.0414474	0.0105916	0.161908	0.0552059	0
BIOMASS BURNING	BIOMASS BURNING BOILER	RESUSPENDED CHAMBER METHOD	PM2.5				0.0155455	0.0102468	0.0258623	0	0.0188864	0.181432	0.000615584	8.39532e-08	8.12354e-06	7.60859e-06	2.50366e-05	6.49795e-09	0	3.76474e-06	0	5.83877e-08	3.57913e-09	0	8.42618e-08	0	0.0498623	0.00776883	0.143131	0.0134143	0	0.0208831	0.00868052	0.130001	0.0781364	0
BIOMASS BURNING	OPEN BURNING-WHEAT	DIRECT PLUME SAMPING	PM2.5			0.0001	0.0018	0.0077	0.0038		0.1376	0.0308	0.0001		0.0005	0.0001	0.006		0.0003	0.0001	0.0006						0.01	0.0002	0.0014	0.0018		0.1728		0.0046	0.4327	0.0508
BIOMASS BURNING	OPEN BURNING-WHEAT	DIRECT PLUME SAMPING	PM2.5			0.0002	0.0014	0.0055	0.003		0.053	0.0456	0.0002		0.0004	0.0001	0.0024		0.0002	0.0001	0.0011						0.1325	0.0029	0.013	0.0012		0.0716		0.0025	0.6287	0.0563
BIOMASS BURNING	BIOMASS BURNING BOILER	RESUSPENDED CHAMBER METHOD	PM2.5				0.00184987	0.0152654	0.0334658		0.044437	0.0157471	0.000378016		0.000330652	0.00131903	0.00347632			0.000233244	0.000812332				0.000369973	6.2775e-05	0.0114474	0.0018951	0.0285377	0.000905003	0.000224293	0.0386322	0.00141256	0.0108533	0.0368773	0.101613
BIOMASS BURNING	BIOMASS BURNING BOILER	RESUSPENDED CHAMBER METHOD	PM2.5			0.012286	0.0161497	0.0118445	0.134511		0.0480422	0.0607294	0.000449136	7.67754e-06	0.00109789	0.00281382	0.0123493		0.000176583	0.00319386	0.00322841	0.000111324	1.34357e-05		0.000191939	4.69339e-05	0.0130959	0.000817452	0.0281016	0.00072349	2.42399e-05	0.0532663	0.00167132	0.0117066	0.0229233	0.1025
BIOMASS BURNING	BIOMASS BURNING BOILER	RESUSPENDED CHAMBER METHOD	PM2.5			0.0266738	0.0247983	0.028382	0.263605		0.0243305	0.149185	0.000957082	8.58369e-06	0.00229185	0.00594421	0.0285536	0	0.000437768	0.00651502	0.0048927	0.000128755	1.71674e-05	4.29185e-06	0.000291845	7.45041e-05	0.00626117	0.00162375	0.0173204	0.000839924	5.83188e-05	0.0190225	0.00142107	0.013417	0.0608629	0.0936064
BIOMASS BURNING	BIOMASS BURNING BOILER	RESUSPENDED CHAMBER METHOD	PM2.5			0.012795	0.0107343	0.0202992	0.130586		0.0143954	0.0727615	0.000610879	1.88285e-05	0.0015	0.0071841	0.0181004	8.3682e-06	0.000251046	0.00329289	0.00229079	8.159e-05	8.3682e-06		0.000133891	0.000132847	0.004213	0.000961412	0.0133591	0.000598965	4.15657e-05	0.014575	0.00131082	0.0124772	0.0325511	0.11785
BIOMASS BURNING	OPEN BURNING-RAPE	DIRECT PLUME SAMPING	PM2.5			0.000350094	0.000136928	0.000609404	0.000218182	0.00180063	0.00575799	0.00161555			0.000260313		0.000266332			0.000103323						0.00685201	0.00426128	0.00338972	0.00512561	0.000229794	0.00305434	0.00624219	0.000199637	0.00190874	0.442118	0.0322444
BIOMASS BURNING	OPEN BURNING-RAPE	DIRECT PLUME SAMPING	PM2.5			0.000990963	0.000331567	0.00141228	0.000427548	0.0022574	0.00834403	0.00615768			0.000301652		0.000618261			0.000155812	9.59801e-05					0.00691448	0.00425979		0.00222117	0.000642069	0.00122233	0.00774473		0.000295436	0.558738	0.0195675
BIOMASS BURNING	OPEN BURNING-RAPE	DIRECT PLUME SAMPING	PM2.5			0.00133031	0.000450091	0.00164247	0.000856624	0.00235753	0.0105826	0.0111706			0.000215971		0.000722323			0.000353902	0.000254083	9.2559e-05				0.00404615	0.00649772		0.00167859	0.000169906	0.00133916	0.00971739			0.490477	0.0217654
BIOMASS BURNING	OPEN BURNING-WHEAT	DIRECT PLUME SAMPING	PM2.5			0.000732655	0.000354302	0.0016198	0.000542091	0.00367623	0.00815171	0.00477613			0.000388529		0.000550416			0.000161887	7.40056e-05					0.0105849	0.00582186	8.78434e-05	0.00475929		0.00178229	0.00660542		0.000450036	0.438675	0.0216423
BIOMASS BURNING	OPEN BURNING-WHEAT	DIRECT PLUME SAMPING	PM2.5			0.0072338	0.00184789	0.00741408	0.00383099	0.00583662	0.00868732	0.042862	0.000146479		0.00127324	7.88732e-05	0.00246761			0.00211831	0.00075493	0.000123944				0.00642998	0.00708631	0.000344561	0.00429015	0.000100613	0.00179545	0.00798076		0.000319874	0.498031	0.0172718
BIOMASS BURNING	OPEN BURNING-WHEAT	DIRECT PLUME SAMPING	PM2.5			0.000701031	0.000272623	0.000837342	0.000272623	0.00567583	0.0266208	0.00553494			0.000234822		0.000318442			0.000163803	0.000117984					0.0048884	0.0245357	0.000478364	0.0101264		0.00573968	0.0231988		0.000421508	0.461237	0.0184539
