# Supplementary material for: Characteristics of the main primary source profiles of particulate matter across China from 1987 to 2017
Source: Copernicus journal article supplement (doi:10.5194/acp-19-3223-2019), 2019-03-12
Supplement: Supplementary file [file acp-19-3223-2019-supplement-title-page.pdf › acp-19-3223-2019-supplement-title-page.pdf]

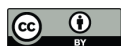

## *Supplement of*

# **Characteristics of the main primary source profiles of particulate matter across China from 1987 to 2017**

**Xiaohui Bi et al.**

*Correspondence to:* Yinchang Feng ([fengyc@nankai.edu.cn](mailto:fengyc@nankai.edu.cn))

- [acp-19-3223-2019-supplement-title-page.pdf](#)
- [Database\\_source profiles in China.xlsx](#)
- [Profile Data from Nankai Source Library-V1.xlsx](#)
- [Supplementary materials.pdf](#)

The copyright of individual parts of the supplement might differ from the CC BY 4.0 License.
